# Supplementary material
Source: MDPI journal article supplement (https://www.mdpi.com/2306-5729/7/11/144)
Supplement: s1 [file s1]

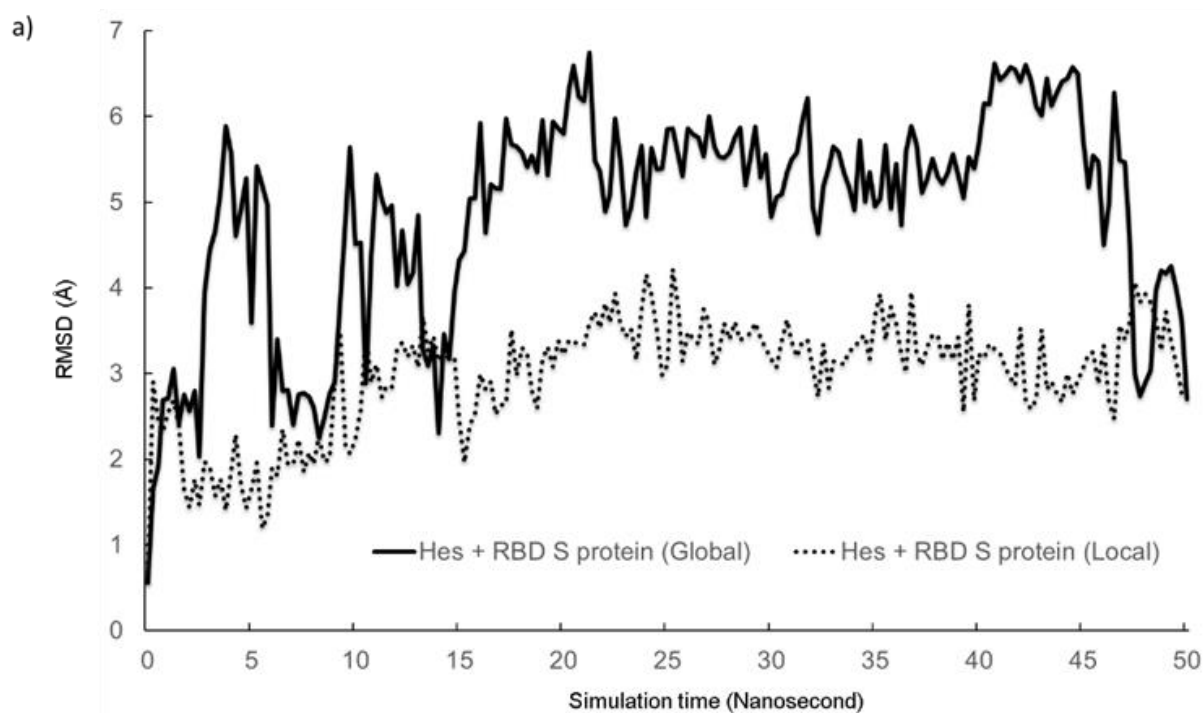

**Figure S1:** Root Mean Square Deviation (RMSD) graph of hesperidin and RBD S protein (Hes + RBD S protein) on Global and Local docking

| Simulation time<br>(nanosecond, ns) | Root-mean square deviation, RMSD (Å) |                   |
|-------------------------------------|--------------------------------------|-------------------|
|                                     | Local simulation                     | Global simulation |
| 0.00                                | 0.58                                 | 0.55              |
| 0.25                                | 2.90                                 | 1.65              |
| 0.5                                 | 2.44                                 | 1.92              |
| 0.75                                | 2.32                                 | 2.69              |
| 1.00                                | 2.55                                 | 2.71              |
| 1.25                                | 2.69                                 | 3.05              |
| 1.50                                | 2.40                                 | 2.42              |
| 1.75                                | 1.64                                 | 2.76              |
| 2.00                                | 1.44                                 | 2.55              |
| 2.25                                | 1.77                                 | 2.80              |
| 2.50                                | 1.47                                 | 2.03              |
| 2.75                                | 1.97                                 | 3.95              |
| 3.00                                | 1.91                                 | 4.45              |
| 3.25                                | 1.58                                 | 4.66              |
| 3.50                                | 1.72                                 | 5.12              |
| 3.75                                | 1.41                                 | 5.89              |
| 4.00                                | 1.86                                 | 5.58              |
| 4.25                                | 2.29                                 | 4.61              |
| 4.50                                | 1.70                                 | 4.92              |
| 4.75                                | 1.43                                 | 5.29              |
| 5.00                                | 1.64                                 | 3.59              |
| 5.25                                | 1.96                                 | 5.42              |
| 5.50                                | 1.19                                 | 5.20              |
| 5.75                                | 1.33                                 | 4.96              |
| 6.00                                | 1.89                                 | 2.39              |
| 6.25                                | 1.81                                 | 3.40              |
| 6.50                                | 2.34                                 | 2.79              |
| 6.75                                | 1.94                                 | 2.81              |
| 7.00                                | 1.94                                 | 2.40              |

---

|       |      |      |
|-------|------|------|
| 7.25  | 2.23 | 2.76 |
| 7.50  | 1.86 | 2.77 |
| 7.75  | 2.07 | 2.73 |
| 8.00  | 1.95 | 2.61 |
| 8.25  | 2.27 | 2.25 |
| 8.5   | 1.97 | 2.48 |
| 8.75  | 2.01 | 2.76 |
| 9.00  | 2.97 | 2.91 |
| 9.25  | 3.50 | 3.84 |
| 9.50  | 2.16 | 4.79 |
| 9.75  | 2.06 | 5.64 |
| 10.0  | 2.24 | 4.52 |
| 10.25 | 2.57 | 4.53 |
| 10.50 | 3.49 | 2.88 |
| 10.75 | 2.89 | 4.38 |
| 11.00 | 3.11 | 5.32 |
| 11.25 | 2.73 | 5.03 |
| 11.50 | 2.86 | 4.88 |
| 11.75 | 2.84 | 4.97 |
| 12.00 | 3.28 | 4.02 |
| 12.25 | 3.36 | 4.66 |
| 12.50 | 3.19 | 4.04 |
| 12.75 | 3.33 | 4.18 |
| 13.00 | 3.07 | 4.84 |
| 13.25 | 3.67 | 3.28 |
| 13.50 | 3.27 | 3.09 |
| 13.75 | 3.43 | 3.33 |
| 14.00 | 3.15 | 2.31 |
| 14.25 | 3.23 | 3.46 |
| 14.50 | 3.17 | 3.17 |
| 14.75 | 3.18 | 3.95 |
| 15.00 | 2.46 | 4.32 |
| 15.25 | 1.95 | 4.43 |
| 15.50 | 2.39 | 5.04 |
| 15.75 | 2.54 | 5.05 |
| 16.00 | 2.99 | 5.93 |
| 16.25 | 2.81 | 4.64 |
| 16.50 | 2.91 | 5.21 |
| 16.75 | 2.53 | 5.17 |
| 17.00 | 2.63 | 5.16 |
| 17.25 | 2.64 | 5.98 |
| 17.50 | 3.51 | 5.67 |
| 17.75 | 2.97 | 5.64 |
| 18.00 | 3.31 | 5.58 |
| 18.25 | 3.22 | 5.41 |
| 18.50 | 2.80 | 5.54 |
| 18.75 | 2.59 | 5.34 |
| 19.00 | 3.16 | 5.96 |
| 19.25 | 3.31 | 5.32 |
| 19.50 | 3.08 | 5.94 |
| 19.75 | 3.38 | 5.86 |
| 20.00 | 3.22 | 5.79 |
| 20.25 | 3.38 | 6.31 |
| 20.50 | 3.36 | 6.59 |
| 20.75 | 3.35 | 6.23 |
| 21.00 | 3.34 | 6.18 |
| 21.25 | 3.58 | 6.75 |
| 21.50 | 3.71 | 5.48 |
| 21.75 | 3.52 | 5.36 |

---

---

|       |      |      |
|-------|------|------|
| 22.00 | 3.82 | 4.89 |
| 22.25 | 3.59 | 5.08 |
| 22.50 | 3.94 | 5.97 |
| 22.75 | 3.58 | 5.48 |
| 23.00 | 3.43 | 4.73 |
| 23.25 | 3.52 | 4.94 |
| 23.50 | 3.16 | 5.36 |
| 23.75 | 3.75 | 5.66 |
| 24.00 | 4.15 | 4.83 |
| 24.25 | 3.92 | 5.64 |
| 24.50 | 3.51 | 5.38 |
| 24.75 | 2.98 | 5.39 |
| 25.00 | 3.10 | 5.85 |
| 25.25 | 4.21 | 5.86 |
| 25.50 | 3.79 | 5.56 |
| 25.75 | 3.14 | 5.31 |
| 26.00 | 3.49 | 5.86 |
| 26.25 | 3.41 | 5.79 |
| 26.50 | 3.34 | 5.75 |
| 26.75 | 3.76 | 5.53 |
| 27.00 | 3.59 | 6.01 |
| 27.25 | 3.11 | 5.65 |
| 27.50 | 3.26 | 5.53 |
| 27.75 | 3.58 | 5.52 |
| 28.00 | 3.39 | 5.58 |
| 28.25 | 3.60 | 5.76 |
| 28.50 | 3.38 | 5.87 |
| 28.75 | 3.43 | 5.19 |
| 29.00 | 3.47 | 5.54 |
| 29.25 | 3.59 | 5.88 |
| 29.50 | 3.42 | 5.29 |
| 29.75 | 3.29 | 5.56 |
| 30.00 | 3.17 | 4.83 |
| 30.25 | 3.08 | 5.06 |
| 30.50 | 3.39 | 5.09 |
| 30.75 | 3.63 | 5.35 |
| 31.00 | 3.37 | 5.49 |
| 31.25 | 3.19 | 5.58 |
| 31.50 | 3.38 | 5.94 |
| 31.75 | 3.39 | 6.22 |
| 32.00 | 3.06 | 4.94 |
| 32.25 | 2.73 | 4.63 |
| 32.50 | 3.35 | 5.19 |
| 32.75 | 2.84 | 5.49 |
| 33.00 | 3.14 | 5.65 |
| 33.25 | 3.13 | 5.58 |
| 33.50 | 3.11 | 5.35 |
| 33.75 | 3.26 | 5.18 |
| 34.00 | 3.29 | 4.91 |
| 34.25 | 3.41 | 5.73 |
| 34.50 | 3.44 | 5.01 |
| 34.75 | 3.17 | 5.35 |
| 35.00 | 3.68 | 4.95 |
| 35.25 | 3.93 | 5.04 |
| 35.50 | 3.38 | 5.66 |
| 35.75 | 3.78 | 4.92 |
| 36.00 | 3.58 | 5.44 |
| 36.25 | 3.21 | 4.74 |
| 36.50 | 3.01 | 5.58 |

---

|       |      |      |
|-------|------|------|
| 36.75 | 3.95 | 5.88 |
| 37.00 | 3.23 | 5.67 |
| 37.25 | 3.09 | 5.10 |
| 37.50 | 3.30 | 5.27 |
| 37.75 | 3.45 | 5.51 |
| 38.00 | 3.45 | 5.29 |
| 38.25 | 3.15 | 5.22 |
| 38.50 | 3.36 | 5.33 |
| 38.75 | 3.16 | 5.56 |
| 39.00 | 3.42 | 5.31 |
| 39.25 | 2.58 | 5.05 |
| 39.50 | 3.80 | 5.53 |
| 39.75 | 2.68 | 5.39 |
| 40.00 | 3.22 | 5.67 |
| 40.25 | 3.17 | 6.15 |
| 40.50 | 3.34 | 6.14 |
| 40.75 | 3.28 | 6.62 |
| 41.00 | 3.24 | 6.42 |
| 41.25 | 3.07 | 6.48 |
| 41.50 | 2.95 | 6.57 |
| 41.75 | 2.86 | 6.55 |
| 42.00 | 3.53 | 6.41 |
| 42.25 | 2.68 | 6.61 |
| 42.50 | 2.59 | 6.43 |
| 42.75 | 2.70 | 6.12 |
| 43.00 | 3.52 | 6.01 |
| 43.25 | 2.81 | 6.45 |
| 43.50 | 2.91 | 6.12 |
| 43.75 | 2.77 | 6.28 |
| 44.00 | 2.66 | 6.41 |
| 44.25 | 3.00 | 6.47 |
| 44.50 | 2.76 | 6.57 |
| 44.75 | 2.92 | 6.49 |
| 45.00 | 3.07 | 5.73 |
| 45.25 | 3.22 | 5.17 |
| 45.50 | 3.25 | 5.54 |
| 45.75 | 2.87 | 5.47 |
| 46.00 | 3.32 | 4.50 |
| 46.25 | 2.67 | 4.99 |
| 46.50 | 2.47 | 6.27 |
| 46.75 | 3.56 | 5.49 |
| 47.00 | 3.40 | 5.46 |
| 47.25 | 3.58 | 4.62 |
| 47.50 | 4.07 | 3.00 |
| 47.75 | 3.83 | 2.74 |
| 48.00 | 3.93 | 2.89 |
| 48.25 | 3.84 | 3.03 |
| 48.50 | 3.63 | 3.97 |
| 48.75 | 3.27 | 4.19 |
| 49.00 | 3.73 | 4.16 |
| 49.25 | 3.37 | 4.25 |
| 49.50 | 3.11 | 3.98 |
| 49.75 | 2.78 | 3.63 |
| 50.00 | 2.92 | 2.70 |

**Table S1:** The Root-mean square deviation (RMSD) values of Global and Local simulation between hesperidin and RBD S protein (Hes + RBD S protein) of SARS-CoV-2

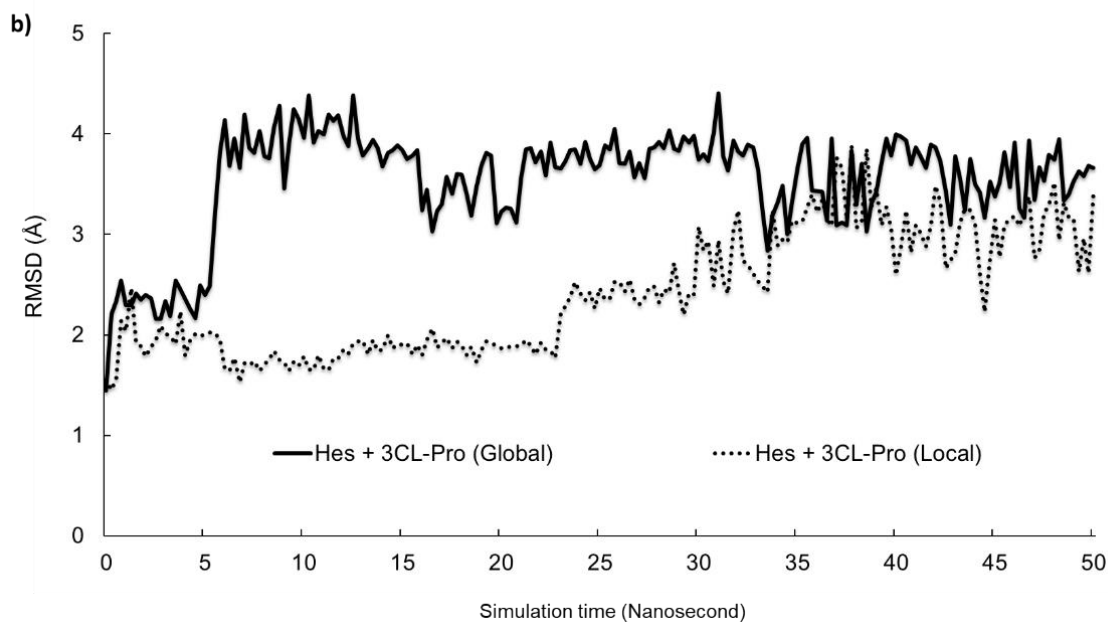

**Figure S2:** Root Mean Square Deviation (RMSD) of hesperidin and 3CL-Pro (Hes + 3CL-Pro) on Global and Local docking

| Simulation time<br>(nanosecond, ns) | Root-mean square deviation, RMSD (Å) |                   |
|-------------------------------------|--------------------------------------|-------------------|
|                                     | Local simulation                     | Global simulation |
| 0.00                                | 1.55                                 | 1.45              |
| 0.25                                | 1.45                                 | 2.21              |
| 0.5                                 | 1.57                                 | 2.34              |
| 0.75                                | 2.14                                 | 2.54              |
| 1.00                                | 2.04                                 | 2.29              |
| 1.25                                | 2.46                                 | 2.29              |
| 1.50                                | 1.92                                 | 2.42              |
| 1.75                                | 1.89                                 | 2.34              |
| 2.00                                | 1.79                                 | 2.39              |
| 2.25                                | 1.88                                 | 2.36              |
| 2.50                                | 1.95                                 | 2.16              |
| 2.75                                | 2.09                                 | 2.16              |
| 3.00                                | 2.01                                 | 2.34              |
| 3.25                                | 1.99                                 | 2.19              |
| 3.50                                | 1.91                                 | 2.54              |
| 3.75                                | 2.25                                 | 2.45              |
| 4.00                                | 1.79                                 | 2.36              |
| 4.25                                | 1.94                                 | 2.26              |
| 4.50                                | 2.01                                 | 2.16              |
| 4.75                                | 1.99                                 | 2.49              |
| 5.00                                | 2.00                                 | 2.39              |
| 5.25                                | 2.02                                 | 2.48              |
| 5.50                                | 2.02                                 | 3.23              |
| 5.75                                | 1.95                                 | 3.82              |
| 6.00                                | 1.66                                 | 4.14              |
| 6.25                                | 1.64                                 | 3.68              |
| 6.50                                | 1.78                                 | 3.95              |
| 6.75                                | 1.53                                 | 3.66              |
| 7.00                                | 1.72                                 | 4.19              |
| 7.25                                | 1.69                                 | 3.86              |
| 7.50                                | 1.74                                 | 3.81              |

---

|       |      |      |
|-------|------|------|
| 7.75  | 1.64 | 4.03 |
| 8.00  | 1.70 | 3.77 |
| 8.25  | 1.75 | 3.75 |
| 8.5   | 1.84 | 4.06 |
| 8.75  | 1.75 | 4.28 |
| 9.00  | 1.72 | 3.46 |
| 9.25  | 1.64 | 3.90 |
| 9.50  | 1.73 | 4.24 |
| 9.75  | 1.69 | 4.15 |
| 10.0  | 1.79 | 3.96 |
| 10.25 | 1.66 | 4.38 |
| 10.50 | 1.65 | 3.91 |
| 10.75 | 1.79 | 4.03 |
| 11.00 | 1.66 | 3.99 |
| 11.25 | 1.65 | 4.19 |
| 11.50 | 1.77 | 4.13 |
| 11.75 | 1.77 | 4.18 |
| 12.00 | 1.85 | 3.97 |
| 12.25 | 1.81 | 3.88 |
| 12.50 | 1.92 | 4.38 |
| 12.75 | 1.95 | 3.95 |
| 13.00 | 1.94 | 3.78 |
| 13.25 | 1.81 | 3.86 |
| 13.50 | 1.98 | 3.94 |
| 13.75 | 1.84 | 3.85 |
| 14.00 | 1.85 | 3.68 |
| 14.25 | 1.99 | 3.81 |
| 14.5  | 1.87 | 3.84 |
| 14.75 | 1.91 | 3.89 |
| 15.00 | 1.90 | 3.84 |
| 15.25 | 1.92 | 3.74 |
| 15.50 | 1.82 | 3.78 |
| 15.75 | 1.90 | 3.84 |
| 16.00 | 1.79 | 3.24 |
| 16.25 | 1.95 | 3.44 |
| 16.50 | 2.06 | 3.03 |
| 16.75 | 1.88 | 3.27 |
| 17.00 | 1.92 | 3.30 |
| 17.25 | 1.97 | 3.57 |
| 17.50 | 1.87 | 3.41 |
| 17.75 | 1.93 | 3.60 |
| 18.00 | 1.89 | 3.59 |
| 18.25 | 1.79 | 3.41 |
| 18.50 | 1.88 | 3.19 |
| 18.75 | 1.72 | 3.49 |
| 19.00 | 1.85 | 3.69 |
| 19.25 | 1.93 | 3.82 |
| 19.50 | 1.91 | 3.78 |
| 19.75 | 1.89 | 3.11 |
| 20.00 | 1.87 | 3.22 |
| 20.25 | 1.87 | 3.27 |
| 20.50 | 1.88 | 3.26 |
| 20.75 | 1.88 | 3.12 |
| 21.00 | 1.89 | 3.56 |
| 21.25 | 1.94 | 3.85 |
| 21.50 | 1.89 | 3.86 |
| 21.75 | 1.81 | 3.72 |
| 22.00 | 1.92 | 3.83 |
| 22.25 | 1.85 | 3.58 |

---

---

|       |      |      |
|-------|------|------|
| 22.50 | 1.84 | 3.91 |
| 22.75 | 1.78 | 3.67 |
| 23.00 | 2.21 | 3.65 |
| 23.25 | 2.28 | 3.73 |
| 23.50 | 2.38 | 3.84 |
| 23.75 | 2.52 | 3.85 |
| 24.00 | 2.41 | 3.70 |
| 24.25 | 2.34 | 3.92 |
| 24.50 | 2.42 | 3.75 |
| 24.75 | 2.26 | 3.65 |
| 25.00 | 2.47 | 3.68 |
| 25.25 | 2.35 | 3.88 |
| 25.50 | 2.36 | 3.84 |
| 25.75 | 2.52 | 4.05 |
| 26.00 | 2.53 | 3.71 |
| 26.25 | 2.43 | 3.71 |
| 26.50 | 2.56 | 3.83 |
| 26.75 | 2.36 | 3.57 |
| 27.00 | 2.31 | 3.71 |
| 27.25 | 2.37 | 3.56 |
| 27.50 | 2.48 | 3.85 |
| 27.75 | 2.48 | 3.87 |
| 28.00 | 2.32 | 3.92 |
| 28.25 | 2.45 | 3.86 |
| 28.50 | 2.42 | 4.04 |
| 28.75 | 2.72 | 3.86 |
| 29.00 | 2.44 | 3.83 |
| 29.25 | 2.20 | 3.98 |
| 29.50 | 2.42 | 3.92 |
| 29.75 | 2.41 | 3.97 |
| 30.00 | 3.08 | 3.74 |
| 30.25 | 2.84 | 3.79 |
| 30.50 | 2.94 | 3.73 |
| 30.75 | 2.48 | 4.01 |
| 31.00 | 2.94 | 4.41 |
| 31.25 | 2.53 | 3.77 |
| 31.50 | 2.41 | 3.64 |
| 31.75 | 3.04 | 3.93 |
| 32.00 | 3.24 | 3.83 |
| 32.25 | 2.74 | 3.78 |
| 32.50 | 2.70 | 3.89 |
| 32.75 | 2.61 | 3.87 |
| 33.00 | 2.54 | 3.65 |
| 33.25 | 2.48 | 3.21 |
| 33.50 | 2.43 | 2.84 |
| 33.75 | 3.24 | 3.18 |
| 34.00 | 2.89 | 3.32 |
| 34.25 | 2.95 | 3.49 |
| 34.50 | 2.92 | 3.00 |
| 34.75 | 3.14 | 3.33 |
| 35.00 | 3.11 | 3.66 |
| 35.25 | 3.14 | 3.90 |
| 35.50 | 3.27 | 3.96 |
| 35.75 | 3.39 | 3.44 |
| 36.00 | 3.22 | 3.43 |
| 36.25 | 3.34 | 3.42 |
| 36.50 | 3.15 | 3.14 |
| 36.75 | 3.09 | 3.95 |
| 37.00 | 3.76 | 3.09 |

---

|       |      |      |
|-------|------|------|
| 37.25 | 3.66 | 3.12 |
| 37.50 | 3.15 | 3.09 |
| 37.75 | 3.88 | 3.83 |
| 38.00 | 3.06 | 3.29 |
| 38.25 | 3.14 | 3.73 |
| 38.50 | 3.85 | 3.02 |
| 38.75 | 3.28 | 3.31 |
| 39.00 | 3.46 | 3.41 |
| 39.25 | 3.08 | 3.71 |
| 39.50 | 3.27 | 3.95 |
| 39.75 | 3.06 | 3.78 |
| 40.00 | 2.59 | 3.99 |
| 40.25 | 2.86 | 3.97 |
| 40.50 | 3.24 | 3.93 |
| 40.75 | 2.82 | 3.69 |
| 41.00 | 3.09 | 3.86 |
| 41.25 | 3.02 | 3.77 |
| 41.50 | 2.88 | 3.66 |
| 41.75 | 3.08 | 3.89 |
| 42.00 | 3.48 | 3.87 |
| 42.25 | 3.32 | 3.73 |
| 42.50 | 2.66 | 3.44 |
| 42.75 | 2.75 | 3.07 |
| 43.00 | 2.82 | 3.78 |
| 43.25 | 3.12 | 3.56 |
| 43.50 | 3.26 | 3.24 |
| 43.75 | 3.24 | 3.75 |
| 44.00 | 3.09 | 3.49 |
| 44.25 | 2.61 | 3.42 |
| 44.50 | 2.22 | 3.17 |
| 44.75 | 2.76 | 3.53 |
| 45.00 | 3.14 | 3.38 |
| 45.25 | 2.77 | 3.52 |
| 45.50 | 3.09 | 3.82 |
| 45.75 | 3.16 | 3.47 |
| 46.00 | 3.18 | 3.91 |
| 46.25 | 3.08 | 3.26 |
| 46.50 | 3.25 | 3.16 |
| 46.75 | 3.37 | 3.93 |
| 47.00 | 2.77 | 3.34 |
| 47.25 | 2.84 | 3.66 |
| 47.50 | 3.21 | 3.53 |
| 47.75 | 3.29 | 3.79 |
| 48.00 | 3.52 | 3.74 |
| 48.25 | 2.94 | 3.94 |
| 48.50 | 3.32 | 3.33 |
| 48.75 | 3.17 | 3.4  |
| 49.00 | 3.15 | 3.53 |
| 49.25 | 2.63 | 3.63 |
| 49.50 | 2.96 | 3.58 |
| 49.75 | 2.62 | 3.68 |
| 50.00 | 3.38 | 3.67 |

**Table S2:** The Root-mean square deviation (RMSD) values of Global and Local simulation between hesperidin and 3CL-Pro (Hes + 3CL-Pro) of SARS-CoV-2



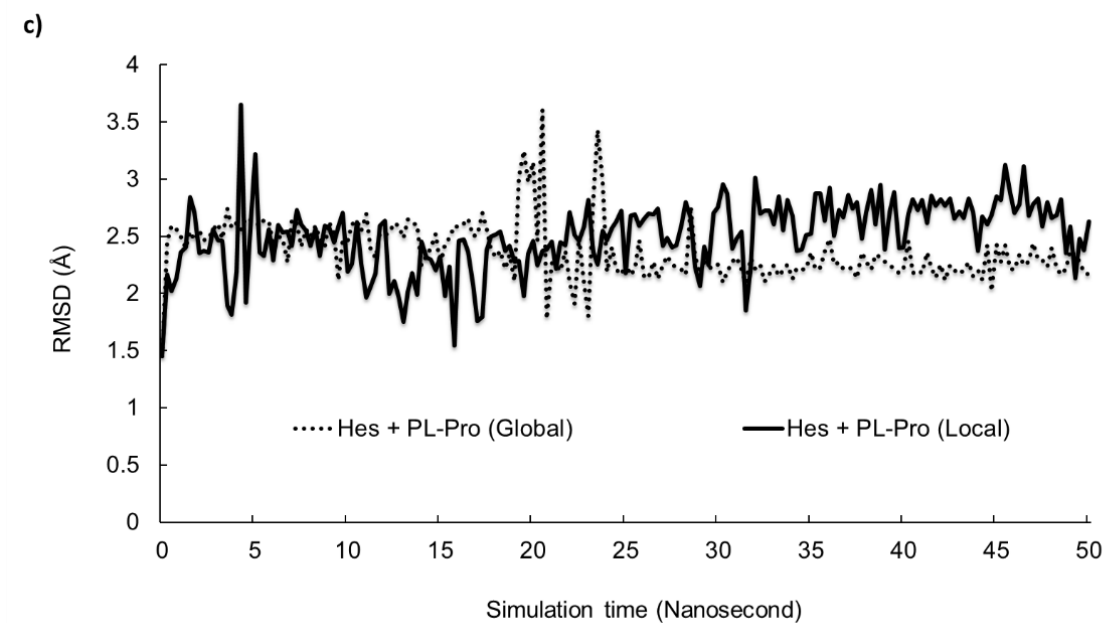

**Figure S3:** The Root Mean Square Deviation (RMSD) of hesperidin and PL-Pro (Hes + PL-Pro) on Global and Local docking

| Simulation time<br>(nanosecond, ns) | Root-mean square deviation, RMSD (Å) |                   |
|-------------------------------------|--------------------------------------|-------------------|
|                                     | Local simulation                     | Global simulation |
| 0.00                                | 1.47                                 | 1.45              |
| 0.25                                | 2.17                                 | 2.45              |
| 0.5                                 | 2.02                                 | 2.59              |
| 0.75                                | 2.14                                 | 2.56              |
| 1.00                                | 2.36                                 | 2.49              |
| 1.25                                | 2.41                                 | 2.39              |
| 1.50                                | 2.84                                 | 2.54              |
| 1.75                                | 2.71                                 | 2.46              |
| 2.00                                | 2.35                                 | 2.55              |
| 2.25                                | 2.37                                 | 2.46              |
| 2.50                                | 2.36                                 | 2.48              |
| 2.75                                | 2.56                                 | 2.56              |
| 3.00                                | 2.47                                 | 2.61              |
| 3.25                                | 2.46                                 | 2.47              |
| 3.50                                | 1.89                                 | 2.74              |
| 3.75                                | 1.82                                 | 2.57              |
| 4.00                                | 2.19                                 | 2.62              |
| 4.25                                | 3.65                                 | 2.56              |
| 4.50                                | 1.92                                 | 2.66              |
| 4.75                                | 2.55                                 | 2.64              |
| 5.00                                | 3.22                                 | 2.62              |
| 5.25                                | 2.36                                 | 2.59              |
| 5.50                                | 2.33                                 | 2.65              |
| 5.75                                | 2.56                                 | 2.63              |
| 6.00                                | 2.29                                 | 2.41              |
| 6.25                                | 2.60                                 | 2.50              |
| 6.50                                | 2.54                                 | 2.48              |
| 6.75                                | 2.54                                 | 2.27              |
| 7.00                                | 2.42                                 | 2.65              |

---

|       |      |      |
|-------|------|------|
| 7.25  | 2.72 | 2.61 |
| 7.50  | 2.60 | 2.41 |
| 7.75  | 2.54 | 2.56 |
| 8.00  | 2.41 | 2.49 |
| 8.25  | 2.56 | 2.59 |
| 8.50  | 2.33 | 2.48 |
| 8.75  | 2.59 | 2.41 |
| 9.00  | 2.57 | 2.63 |
| 9.25  | 2.44 | 2.53 |
| 9.50  | 2.58 | 2.12 |
| 9.75  | 2.70 | 2.47 |
| 10.00 | 2.19 | 2.46 |
| 10.25 | 2.25 | 2.60 |
| 10.50 | 2.65 | 2.64 |
| 10.75 | 2.26 | 2.55 |
| 11.00 | 1.96 | 2.69 |
| 11.25 | 2.06 | 2.38 |
| 11.50 | 2.18 | 2.31 |
| 11.75 | 2.59 | 2.52 |
| 12.00 | 2.64 | 2.51 |
| 12.25 | 1.99 | 2.53 |
| 12.50 | 2.11 | 2.62 |
| 12.75 | 1.98 | 2.59 |
| 13.00 | 1.75 | 2.48 |
| 13.25 | 2.02 | 2.64 |
| 13.50 | 2.18 | 2.61 |
| 13.75 | 1.99 | 2.60 |
| 14.00 | 2.46 | 2.25 |
| 14.25 | 2.31 | 2.33 |
| 14.50 | 2.29 | 2.39 |
| 14.75 | 2.20 | 2.52 |
| 15.00 | 2.32 | 2.25 |
| 15.25 | 1.98 | 2.44 |
| 15.50 | 2.24 | 2.48 |
| 15.75 | 1.55 | 2.59 |
| 16.00 | 2.46 | 2.58 |
| 16.25 | 2.47 | 2.60 |
| 16.50 | 2.37 | 2.65 |
| 16.75 | 2.08 | 2.50 |
| 17.00 | 1.76 | 2.51 |
| 17.25 | 1.79 | 2.71 |
| 17.50 | 2.38 | 2.56 |
| 17.75 | 2.49 | 2.38 |
| 18.00 | 2.52 | 2.32 |
| 18.25 | 2.54 | 2.32 |
| 18.50 | 2.37 | 2.22 |
| 18.75 | 2.42 | 2.34 |
| 19.00 | 2.28 | 2.11 |
| 19.25 | 2.29 | 3.01 |
| 19.50 | 1.98 | 3.25 |
| 19.75 | 2.35 | 2.97 |
| 20.00 | 2.46 | 3.14 |
| 20.25 | 2.25 | 2.46 |
| 20.50 | 2.37 | 3.61 |
| 20.75 | 2.39 | 1.78 |
| 21.00 | 2.46 | 2.26 |
| 21.25 | 2.22 | 2.25 |
| 21.50 | 2.45 | 2.19 |
| 21.75 | 2.42 | 2.37 |

---

---

|       |      |      |
|-------|------|------|
| 22.00 | 2.71 | 2.09 |
| 22.25 | 2.50 | 1.91 |
| 22.50 | 2.46 | 2.49 |
| 22.75 | 2.58 | 2.09 |
| 23.00 | 2.81 | 1.80 |
| 23.25 | 2.36 | 2.83 |
| 23.5  | 2.25 | 3.43 |
| 23.75 | 2.55 | 2.98 |
| 24.00 | 2.47 | 2.19 |
| 24.25 | 2.57 | 2.41 |
| 24.50 | 2.63 | 2.21 |
| 24.75 | 2.72 | 2.17 |
| 25.00 | 2.18 | 2.27 |
| 25.25 | 2.68 | 2.16 |
| 25.50 | 2.69 | 2.22 |
| 25.75 | 2.59 | 2.47 |
| 26.00 | 2.65 | 2.14 |
| 26.25 | 2.70 | 2.14 |
| 26.50 | 2.69 | 2.28 |
| 26.75 | 2.75 | 2.13 |
| 27.00 | 2.42 | 2.25 |
| 27.25 | 2.48 | 2.33 |
| 27.50 | 2.40 | 2.25 |
| 27.75 | 2.42 | 2.23 |
| 28.00 | 2.59 | 2.21 |
| 28.25 | 2.79 | 2.17 |
| 28.50 | 2.66 | 2.76 |
| 28.75 | 2.24 | 2.33 |
| 29.00 | 2.07 | 2.17 |
| 29.25 | 2.41 | 2.27 |
| 29.50 | 2.25 | 2.23 |
| 29.75 | 2.70 | 2.22 |
| 30.00 | 2.75 | 2.26 |
| 30.25 | 2.95 | 2.10 |
| 30.50 | 2.87 | 2.19 |
| 30.75 | 2.39 | 2.28 |
| 31.00 | 2.48 | 2.32 |
| 31.25 | 2.54 | 2.21 |
| 31.50 | 1.85 | 2.09 |
| 31.75 | 2.24 | 2.31 |
| 32.00 | 3.01 | 2.21 |
| 32.25 | 2.69 | 2.26 |
| 32.50 | 2.72 | 2.10 |
| 32.75 | 2.72 | 2.17 |
| 33.00 | 2.60 | 2.25 |
| 33.25 | 2.85 | 2.16 |
| 33.50 | 2.55 | 2.20 |
| 33.75 | 2.82 | 2.25 |
| 34.00 | 2.68 | 2.13 |
| 34.25 | 2.37 | 2.22 |
| 34.50 | 2.37 | 2.21 |
| 34.75 | 2.51 | 2.22 |
| 35.00 | 2.53 | 2.36 |
| 35.25 | 2.87 | 2.21 |
| 35.50 | 2.87 | 2.23 |
| 35.75 | 2.63 | 2.37 |
| 36.00 | 2.92 | 2.48 |
| 36.25 | 2.50 | 2.25 |
| 36.50 | 2.73 | 2.27 |

---

|       |      |      |
|-------|------|------|
| 36.75 | 2.67 | 2.22 |
| 37.00 | 2.86 | 2.23 |
| 37.25 | 2.74 | 2.22 |
| 37.50 | 2.79 | 2.13 |
| 37.75 | 2.48 | 2.36 |
| 38.00 | 2.71 | 2.28 |
| 38.25 | 2.91 | 2.21 |
| 38.50 | 2.60 | 2.34 |
| 38.75 | 2.95 | 2.31 |
| 39.00 | 2.39 | 2.28 |
| 39.25 | 2.72 | 2.25 |
| 39.50 | 2.89 | 2.22 |
| 39.75 | 2.39 | 2.18 |
| 40.00 | 2.41 | 2.22 |
| 40.25 | 2.70 | 2.46 |
| 40.50 | 2.83 | 2.18 |
| 40.75 | 2.73 | 2.20 |
| 41.00 | 2.82 | 2.18 |
| 41.25 | 2.62 | 2.36 |
| 41.50 | 2.86 | 2.22 |
| 41.75 | 2.77 | 2.14 |
| 42.00 | 2.83 | 2.26 |
| 42.25 | 2.77 | 2.11 |
| 42.50 | 2.83 | 2.25 |
| 42.75 | 2.66 | 2.21 |
| 43.00 | 2.72 | 2.17 |
| 43.25 | 2.66 | 2.20 |
| 43.50 | 2.83 | 2.21 |
| 43.75 | 2.72 | 2.15 |
| 44.00 | 2.37 | 2.20 |
| 44.25 | 2.68 | 2.12 |
| 44.50 | 2.60 | 2.42 |
| 44.75 | 2.68 | 2.02 |
| 45.00 | 2.85 | 2.43 |
| 45.25 | 2.82 | 2.27 |
| 45.50 | 3.13 | 2.43 |
| 45.75 | 2.88 | 2.22 |
| 46.00 | 2.71 | 2.21 |
| 46.25 | 2.78 | 2.34 |
| 46.50 | 3.11 | 2.24 |
| 46.75 | 2.68 | 2.27 |
| 47.00 | 2.78 | 2.42 |
| 47.25 | 2.83 | 2.29 |
| 47.50 | 2.58 | 2.29 |
| 47.75 | 2.79 | 2.23 |
| 48.00 | 2.65 | 2.39 |
| 48.25 | 2.63 | 2.22 |
| 48.50 | 2.82 | 2.17 |
| 48.75 | 2.35 | 2.22 |
| 49.00 | 2.58 | 2.38 |
| 49.25 | 2.12 | 2.33 |
| 49.50 | 2.48 | 2.28 |
| 49.75 | 2.38 | 2.18 |
| 50.00 | 2.63 | 2.16 |

**Table S3:** The Root-mean square deviation (RMSD) values of Global and Local simulation between hesperidin and PL-Pro (Hes + PL-Pro) of SARS-CoV-2

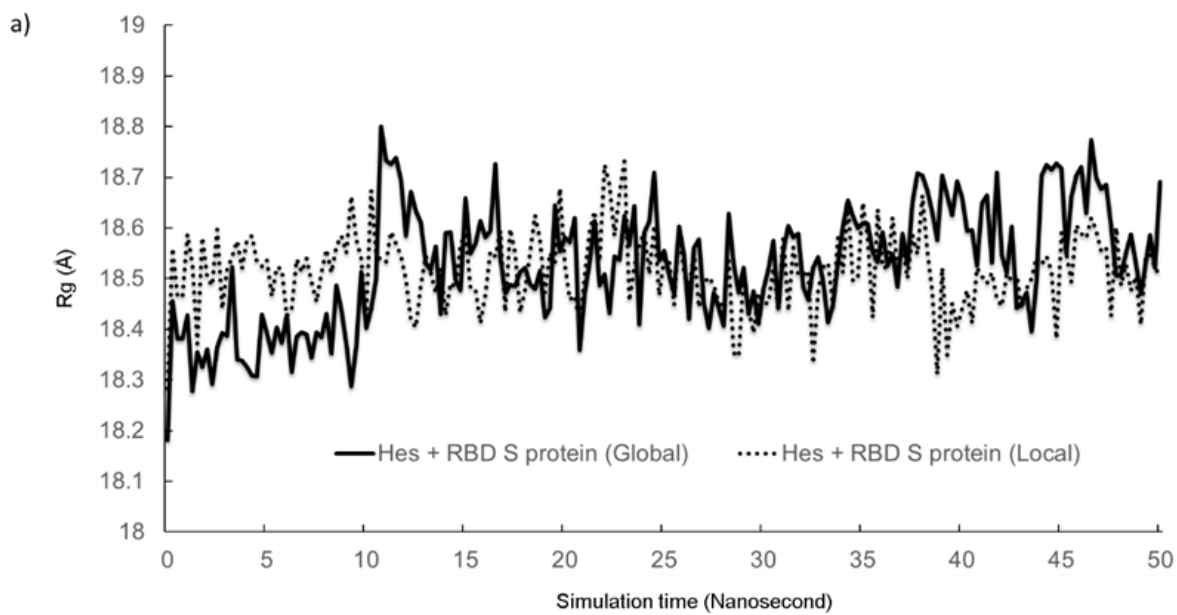

**Figure S4:** Radius of gyration ( $R_g$ ) of hesperidin and RBD S protein (Hes + RBD S protein) on Global and Local docking

| Simulation time<br>(nanosecond, ns) | Radius of gyration, $R_g$ (Å) |                   |
|-------------------------------------|-------------------------------|-------------------|
|                                     | Local simulation              | Global simulation |
| 0.00                                | 18.28                         | 18.18             |
| 0.25                                | 18.56                         | 18.56             |
| 0.5                                 | 18.47                         | 18.38             |
| 0.75                                | 18.46                         | 18.38             |
| 1.00                                | 18.59                         | 18.43             |
| 1.25                                | 18.53                         | 18.28             |
| 1.50                                | 18.37                         | 18.36             |
| 1.75                                | 18.58                         | 18.33             |
| 2.00                                | 18.50                         | 18.36             |
| 2.25                                | 18.49                         | 18.29             |
| 2.50                                | 18.59                         | 18.37             |
| 2.75                                | 18.44                         | 18.39             |
| 3.00                                | 18.52                         | 18.39             |
| 3.25                                | 18.54                         | 18.52             |
| 3.50                                | 18.57                         | 18.34             |
| 3.75                                | 18.52                         | 18.34             |
| 4.00                                | 18.58                         | 18.33             |
| 4.25                                | 18.59                         | 18.31             |
| 4.50                                | 18.53                         | 18.31             |
| 4.75                                | 18.52                         | 18.43             |
| 5.00                                | 18.54                         | 18.39             |
| 5.25                                | 18.47                         | 18.35             |
| 5.50                                | 18.52                         | 18.40             |
| 5.75                                | 18.52                         | 18.37             |
| 6.00                                | 18.43                         | 18.43             |
| 6.25                                | 18.44                         | 18.32             |
| 6.50                                | 18.54                         | 18.39             |
| 6.75                                | 18.51                         | 18.39             |
| 7.00                                | 18.54                         | 18.39             |
| 7.25                                | 18.49                         | 18.34             |

---

|       |       |       |
|-------|-------|-------|
| 7.50  | 18.45 | 18.39 |
| 7.75  | 18.51 | 18.38 |
| 8.00  | 18.56 | 18.43 |
| 8.25  | 18.51 | 18.35 |
| 8.5   | 18.56 | 18.49 |
| 8.75  | 18.59 | 18.44 |
| 9.00  | 18.55 | 18.37 |
| 9.25  | 18.66 | 18.28 |
| 9.50  | 18.58 | 18.36 |
| 9.75  | 18.54 | 18.51 |
| 10.0  | 18.42 | 18.40 |
| 10.25 | 18.67 | 18.44 |
| 10.50 | 18.55 | 18.50 |
| 10.75 | 18.54 | 18.80 |
| 11.00 | 18.53 | 18.73 |
| 11.25 | 18.59 | 18.77 |
| 11.50 | 18.57 | 18.74 |
| 11.75 | 18.55 | 18.69 |
| 12.00 | 18.49 | 18.58 |
| 12.25 | 18.42 | 18.67 |
| 12.50 | 18.40 | 18.63 |
| 12.75 | 18.49 | 18.61 |
| 13.00 | 18.55 | 18.53 |
| 13.25 | 18.51 | 18.52 |
| 13.50 | 18.47 | 18.56 |
| 13.75 | 18.52 | 18.43 |
| 14.00 | 18.43 | 18.59 |
| 14.25 | 18.49 | 18.59 |
| 14.5  | 18.48 | 18.49 |
| 14.75 | 18.57 | 18.48 |
| 15.00 | 18.59 | 18.66 |
| 15.25 | 18.48 | 18.55 |
| 15.50 | 18.48 | 18.57 |
| 15.75 | 18.41 | 18.61 |
| 16.00 | 18.47 | 18.58 |
| 16.25 | 18.55 | 18.59 |
| 16.50 | 18.54 | 18.73 |
| 16.75 | 18.59 | 18.54 |
| 17.00 | 18.44 | 18.47 |
| 17.25 | 18.59 | 18.49 |
| 17.50 | 18.55 | 18.49 |
| 17.75 | 18.43 | 18.51 |
| 18.00 | 18.48 | 18.52 |
| 18.25 | 18.55 | 18.49 |
| 18.50 | 18.63 | 18.48 |
| 18.75 | 18.58 | 18.52 |
| 19.00 | 18.47 | 18.42 |
| 19.25 | 18.55 | 18.44 |
| 19.50 | 18.53 | 18.65 |
| 19.75 | 18.68 | 18.55 |
| 20.00 | 18.53 | 18.58 |
| 20.25 | 18.46 | 18.57 |
| 20.50 | 18.47 | 18.62 |
| 20.75 | 18.41 | 18.36 |
| 21.00 | 18.51 | 18.47 |
| 21.25 | 18.59 | 18.53 |
| 21.50 | 18.63 | 18.61 |
| 21.75 | 18.53 | 18.49 |
| 22.00 | 18.73 | 18.51 |

---

---

|       |       |       |
|-------|-------|-------|
| 22.25 | 18.69 | 18.43 |
| 22.50 | 18.58 | 18.54 |
| 22.75 | 18.67 | 18.54 |
| 23.00 | 18.73 | 18.62 |
| 23.25 | 18.46 | 18.57 |
| 23.50 | 18.52 | 18.64 |
| 23.75 | 18.57 | 18.41 |
| 24.00 | 18.59 | 18.59 |
| 24.25 | 18.51 | 18.61 |
| 24.50 | 18.61 | 18.71 |
| 24.75 | 18.47 | 18.54 |
| 25.00 | 18.54 | 18.56 |
| 25.25 | 18.54 | 18.51 |
| 25.50 | 18.45 | 18.47 |
| 25.75 | 18.60 | 18.60 |
| 26.00 | 18.51 | 18.55 |
| 26.25 | 18.47 | 18.42 |
| 26.50 | 18.56 | 18.56 |
| 26.75 | 18.44 | 18.58 |
| 27.00 | 18.49 | 18.45 |
| 27.25 | 18.50 | 18.40 |
| 27.50 | 18.49 | 18.47 |
| 27.75 | 18.45 | 18.44 |
| 28.00 | 18.44 | 18.41 |
| 28.25 | 18.54 | 18.63 |
| 28.50 | 18.35 | 18.53 |
| 28.75 | 18.35 | 18.47 |
| 29.00 | 18.50 | 18.52 |
| 29.25 | 18.44 | 18.43 |
| 29.50 | 18.39 | 18.48 |
| 29.75 | 18.47 | 18.41 |
| 30.00 | 18.45 | 18.48 |
| 30.25 | 18.45 | 18.52 |
| 30.50 | 18.52 | 18.57 |
| 30.75 | 18.44 | 18.44 |
| 31.00 | 18.59 | 18.56 |
| 31.25 | 18.44 | 18.60 |
| 31.50 | 18.56 | 18.58 |
| 31.75 | 18.51 | 18.59 |
| 32.00 | 18.51 | 18.48 |
| 32.25 | 18.52 | 18.46 |
| 32.50 | 18.33 | 18.52 |
| 32.75 | 18.48 | 18.54 |
| 33.00 | 18.52 | 18.49 |
| 33.25 | 18.53 | 18.41 |
| 33.50 | 18.44 | 18.45 |
| 33.75 | 18.58 | 18.53 |
| 34.00 | 18.51 | 18.60 |
| 34.25 | 18.66 | 18.65 |
| 34.50 | 18.49 | 18.62 |
| 34.75 | 18.50 | 18.60 |
| 35.00 | 18.65 | 18.61 |
| 35.25 | 18.58 | 18.61 |
| 35.50 | 18.42 | 18.55 |
| 35.75 | 18.64 | 18.53 |
| 36.00 | 18.52 | 18.59 |
| 36.25 | 18.52 | 18.52 |
| 36.50 | 18.62 | 18.55 |
| 36.75 | 18.52 | 18.48 |

---

|       |       |       |
|-------|-------|-------|
| 37.00 | 18.56 | 18.50 |
| 37.25 | 18.50 | 18.53 |
| 37.50 | 18.59 | 18.65 |
| 37.75 | 18.55 | 18.71 |
| 38.00 | 18.66 | 18.70 |
| 38.25 | 18.55 | 18.67 |
| 38.50 | 18.47 | 18.63 |
| 38.75 | 18.31 | 18.58 |
| 39.00 | 18.52 | 18.70 |
| 39.25 | 18.35 | 18.67 |
| 39.50 | 18.45 | 18.63 |
| 39.75 | 18.41 | 18.69 |
| 40.00 | 18.44 | 18.66 |
| 40.25 | 18.48 | 18.59 |
| 40.50 | 18.41 | 18.59 |
| 40.75 | 18.52 | 18.53 |
| 41.00 | 18.50 | 18.65 |
| 41.25 | 18.49 | 18.67 |
| 41.50 | 18.51 | 18.53 |
| 41.75 | 18.46 | 18.71 |
| 42.00 | 18.45 | 18.55 |
| 42.25 | 18.51 | 18.51 |
| 42.50 | 18.49 | 18.60 |
| 42.75 | 18.51 | 18.44 |
| 43.00 | 18.44 | 18.45 |
| 43.25 | 18.48 | 18.47 |
| 43.50 | 18.50 | 18.39 |
| 43.75 | 18.54 | 18.49 |
| 44.00 | 18.53 | 18.70 |
| 44.25 | 18.54 | 18.72 |
| 44.50 | 18.52 | 18.72 |
| 44.75 | 18.38 | 18.73 |
| 45.00 | 18.59 | 18.72 |
| 45.25 | 18.55 | 18.55 |
| 45.50 | 18.49 | 18.66 |
| 45.75 | 18.61 | 18.70 |
| 46.00 | 18.59 | 18.72 |
| 46.25 | 18.58 | 18.63 |
| 46.50 | 18.62 | 18.77 |
| 46.75 | 18.59 | 18.70 |
| 47.00 | 18.55 | 18.68 |
| 47.25 | 18.56 | 18.69 |
| 47.50 | 18.43 | 18.60 |
| 47.75 | 18.60 | 18.51 |
| 48.00 | 18.49 | 18.51 |
| 48.25 | 18.53 | 18.55 |
| 48.50 | 18.48 | 18.59 |
| 48.75 | 18.50 | 18.53 |
| 49.00 | 18.41 | 18.47 |
| 49.25 | 18.55 | 18.53 |
| 49.50 | 18.55 | 18.59 |
| 49.75 | 18.52 | 18.52 |
| 50.00 | 18.50 | 18.69 |

**Table S4:** The Radius of gyration (Rg) values of Global and Local simulation between hesperidin and RBD S protein (Hes + RBD S protein) of SARS-CoV-2



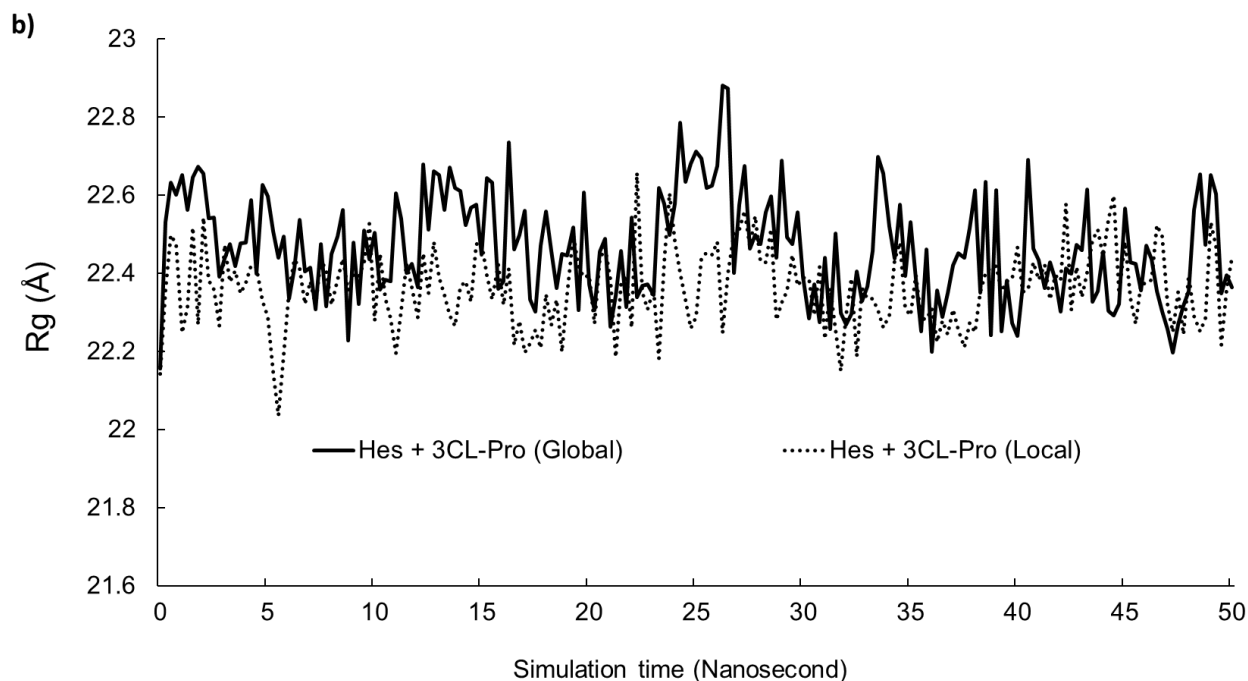

**Figure S5:** Radius of gyration (Rg) of hesperidin and 3CL-Pro (Hes + 3CL-Pro) on Global and Local docking of SARS-CoV-2

| Simulation time<br>(nanosecond, ns) | Radius of gyration, Rg (Å) |                   |
|-------------------------------------|----------------------------|-------------------|
|                                     | Local simulation           | Global simulation |
| 0.00                                | 22.14                      | 22.15             |
| 0.25                                | 22.35                      | 22.53             |
| 0.5                                 | 22.49                      | 22.63             |
| 0.75                                | 22.47                      | 22.60             |
| 1.00                                | 22.24                      | 22.65             |
| 1.25                                | 22.31                      | 22.56             |
| 1.50                                | 22.51                      | 22.64             |
| 1.75                                | 22.26                      | 22.67             |
| 2.00                                | 22.54                      | 22.65             |
| 2.25                                | 22.38                      | 22.54             |
| 2.50                                | 22.35                      | 22.54             |
| 2.75                                | 22.26                      | 22.39             |
| 3.00                                | 22.47                      | 22.44             |
| 3.25                                | 22.37                      | 22.47             |
| 3.50                                | 22.41                      | 22.42             |
| 3.75                                | 22.35                      | 22.48             |
| 4.00                                | 22.38                      | 22.48             |
| 4.25                                | 22.42                      | 22.58             |
| 4.50                                | 22.41                      | 22.39             |
| 4.75                                | 22.33                      | 22.63             |
| 5.00                                | 22.29                      | 22.59             |
| 5.25                                | 22.14                      | 22.51             |
| 5.50                                | 22.03                      | 22.44             |
| 5.75                                | 22.19                      | 22.49             |
| 6.00                                | 22.35                      | 22.33             |
| 6.25                                | 22.43                      | 22.41             |
| 6.50                                | 22.41                      | 22.53             |
| 6.75                                | 22.32                      | 22.40             |
| 7.00                                | 22.3                       | 22.41             |
| 7.25                                | 22.38                      | 22.30             |
| 7.50                                | 22.43                      | 22.47             |
| 7.75                                | 22.40                      | 22.31             |
| 8.00                                | 22.31                      | 22.45             |

---

|       |       |       |
|-------|-------|-------|
| 8.25  | 22.38 | 22.49 |
| 08.5  | 22.43 | 22.56 |
| 8.75  | 22.35 | 22.23 |
| 9.00  | 22.39 | 22.47 |
| 9.25  | 22.39 | 22.32 |
| 9.50  | 22.42 | 22.51 |
| 9.75  | 22.52 | 22.43 |
| 10.0  | 22.27 | 22.50 |
| 10.25 | 22.45 | 22.35 |
| 10.50 | 22.33 | 22.38 |
| 10.75 | 22.28 | 22.38 |
| 11.00 | 22.19 | 22.60 |
| 11.25 | 22.30 | 22.53 |
| 11.50 | 22.45 | 22.40 |
| 11.75 | 22.36 | 22.43 |
| 12.00 | 22.28 | 22.36 |
| 12.25 | 22.45 | 22.67 |
| 12.50 | 22.34 | 22.51 |
| 12.75 | 22.48 | 22.66 |
| 13.00 | 22.38 | 22.65 |
| 13.25 | 22.34 | 22.56 |
| 13.50 | 22.29 | 22.67 |
| 13.75 | 22.26 | 22.61 |
| 14.00 | 22.36 | 22.61 |
| 14.25 | 22.37 | 22.52 |
| 14.5  | 22.32 | 22.56 |
| 14.75 | 22.47 | 22.57 |
| 15.00 | 22.47 | 22.44 |
| 15.25 | 22.39 | 22.64 |
| 15.50 | 22.33 | 22.63 |
| 15.75 | 22.42 | 22.36 |
| 16.00 | 22.31 | 22.37 |
| 16.25 | 22.41 | 22.73 |
| 16.50 | 22.21 | 22.46 |
| 16.75 | 22.27 | 22.49 |
| 17.00 | 22.19 | 22.56 |
| 17.25 | 22.22 | 22.33 |
| 17.50 | 22.25 | 22.30 |
| 17.75 | 22.20 | 22.47 |
| 18.00 | 22.34 | 22.55 |
| 18.25 | 22.26 | 22.45 |
| 18.50 | 22.33 | 22.36 |
| 18.75 | 22.19 | 22.45 |
| 19.00 | 22.34 | 22.44 |
| 19.25 | 22.49 | 22.52 |
| 19.50 | 22.41 | 22.31 |
| 19.75 | 22.38 | 22.61 |
| 20.00 | 22.39 | 22.37 |
| 20.25 | 22.27 | 22.31 |
| 20.50 | 22.43 | 22.45 |
| 20.75 | 22.46 | 22.48 |
| 21.00 | 22.38 | 22.26 |
| 21.25 | 22.18 | 22.34 |
| 21.50 | 22.37 | 22.45 |
| 21.75 | 22.39 | 22.31 |
| 22.00 | 22.26 | 22.54 |
| 22.25 | 22.65 | 22.33 |
| 22.50 | 22.35 | 22.36 |
| 22.75 | 22.30 | 22.37 |

---

---

|       |       |       |
|-------|-------|-------|
| 23.00 | 22.3  | 22.34 |
| 23.25 | 22.18 | 22.61 |
| 23.5  | 22.43 | 22.57 |
| 23.75 | 22.60 | 22.49 |
| 24.00 | 22.48 | 22.57 |
| 24.25 | 22.40 | 22.78 |
| 24.50 | 22.33 | 22.63 |
| 24.75 | 22.25 | 22.68 |
| 25.00 | 22.28 | 22.71 |
| 25.25 | 22.43 | 22.69 |
| 25.50 | 22.45 | 22.61 |
| 25.75 | 22.44 | 22.62 |
| 26.00 | 22.48 | 22.67 |
| 26.25 | 22.24 | 22.88 |
| 26.50 | 22.39 | 22.87 |
| 26.75 | 22.50 | 22.40 |
| 27.00 | 22.51 | 22.57 |
| 27.25 | 22.56 | 22.67 |
| 27.50 | 22.46 | 22.46 |
| 27.75 | 22.54 | 22.49 |
| 28.00 | 22.43 | 22.47 |
| 28.25 | 22.42 | 22.55 |
| 28.50 | 22.51 | 22.59 |
| 28.75 | 22.28 | 22.44 |
| 29.00 | 22.32 | 22.68 |
| 29.25 | 22.35 | 22.49 |
| 29.50 | 22.44 | 22.47 |
| 29.75 | 22.36 | 22.55 |
| 30.00 | 22.3  | 22.39 |
| 30.25 | 22.38 | 22.28 |
| 30.50 | 22.29 | 22.37 |
| 30.75 | 22.42 | 22.27 |
| 31.00 | 22.23 | 22.44 |
| 31.25 | 22.36 | 22.25 |
| 31.50 | 22.25 | 22.50 |
| 31.75 | 22.15 | 22.29 |
| 32.00 | 22.29 | 22.26 |
| 32.25 | 22.38 | 22.29 |
| 32.50 | 22.18 | 22.40 |
| 32.75 | 22.36 | 22.32 |
| 33.00 | 22.33 | 22.36 |
| 33.25 | 22.33 | 22.45 |
| 33.50 | 22.31 | 22.69 |
| 33.75 | 22.21 | 22.65 |
| 34.00 | 22.29 | 22.52 |
| 34.25 | 22.43 | 22.43 |
| 34.50 | 22.48 | 22.57 |
| 34.75 | 22.31 | 22.39 |
| 35.00 | 22.29 | 22.53 |
| 35.25 | 22.39 | 22.38 |
| 35.50 | 22.28 | 22.25 |
| 35.75 | 22.28 | 22.46 |
| 36.00 | 22.30 | 22.19 |
| 36.25 | 22.22 | 22.35 |
| 36.50 | 22.28 | 22.28 |
| 36.75 | 22.24 | 22.34 |
| 37.00 | 22.30 | 22.42 |
| 37.25 | 22.25 | 22.45 |
| 37.50 | 22.21 | 22.43 |

---

|       |       |       |
|-------|-------|-------|
| 37.75 | 22.27 | 22.51 |
| 38.00 | 22.24 | 22.61 |
| 38.25 | 22.35 | 22.35 |
| 38.50 | 22.40 | 22.63 |
| 38.75 | 22.41 | 22.24 |
| 39.00 | 22.41 | 22.61 |
| 39.25 | 22.35 | 22.25 |
| 39.50 | 22.37 | 22.38 |
| 39.75 | 22.38 | 22.27 |
| 40.00 | 22.46 | 22.23 |
| 40.25 | 22.35 | 22.36 |
| 40.50 | 22.35 | 22.69 |
| 40.75 | 22.42 | 22.46 |
| 41.00 | 22.38 | 22.43 |
| 41.25 | 22.42 | 22.36 |
| 41.50 | 22.33 | 22.42 |
| 41.75 | 22.39 | 22.38 |
| 42.00 | 22.38 | 22.30 |
| 42.25 | 22.58 | 22.41 |
| 42.50 | 22.31 | 22.39 |
| 42.75 | 22.41 | 22.47 |
| 43.00 | 22.33 | 22.46 |
| 43.25 | 22.40 | 22.61 |
| 43.50 | 22.48 | 22.32 |
| 43.75 | 22.51 | 22.36 |
| 44.00 | 22.44 | 22.46 |
| 44.25 | 22.53 | 22.30 |
| 44.50 | 22.59 | 22.29 |
| 44.75 | 22.35 | 22.32 |
| 45.00 | 22.48 | 22.57 |
| 45.25 | 22.34 | 22.43 |
| 45.50 | 22.27 | 22.43 |
| 45.75 | 22.37 | 22.36 |
| 46.00 | 22.37 | 22.47 |
| 46.25 | 22.38 | 22.44 |
| 46.50 | 22.52 | 22.35 |
| 46.75 | 22.49 | 22.30 |
| 47.00 | 22.32 | 22.25 |
| 47.25 | 22.25 | 22.19 |
| 47.50 | 22.35 | 22.26 |
| 47.75 | 22.24 | 22.31 |
| 48.00 | 22.39 | 22.35 |
| 48.25 | 22.29 | 22.56 |
| 48.50 | 22.25 | 22.65 |
| 48.75 | 22.29 | 22.47 |
| 49.00 | 22.53 | 22.65 |
| 49.25 | 22.47 | 22.60 |
| 49.50 | 22.22 | 22.34 |
| 49.75 | 22.36 | 22.39 |
| 50.00 | 22.44 | 22.36 |

**Table S5:** The Radius of gyration (Rg) values of Global and Local simulation between hesperidin and 3CL-Pro (Hes + 3CL-Pro) of SARS-CoV-2

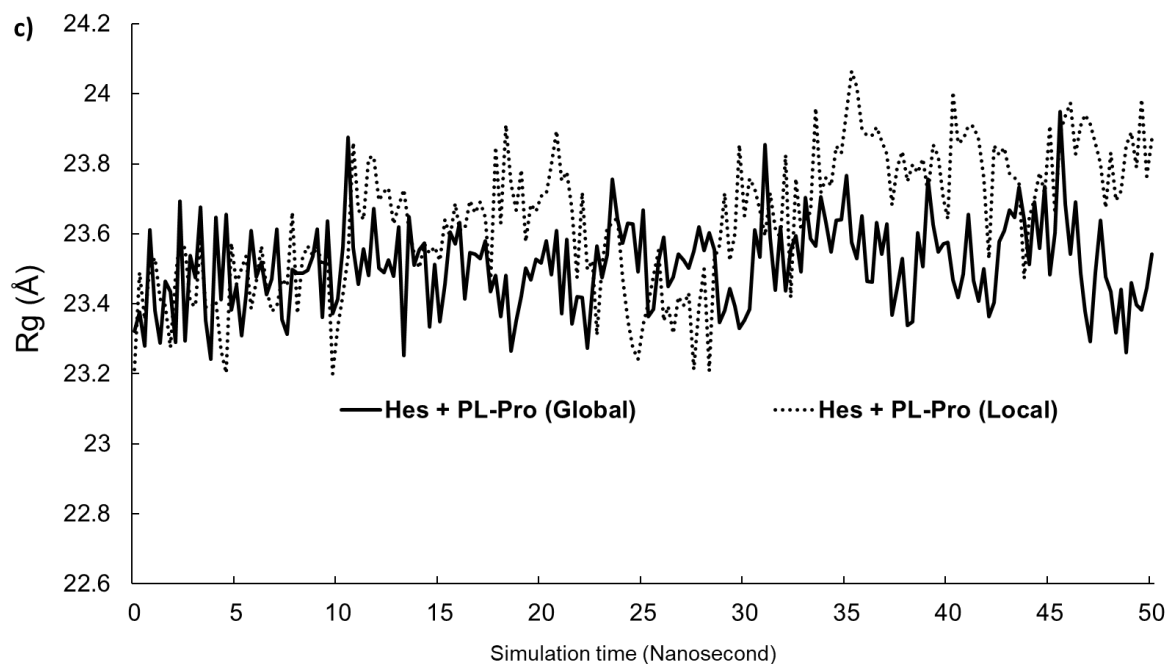

**Figure S6:** Radius of gyration (Rg) of hesperidin and PL-Pro (Hes + PL-Pro) on Global and Local docking of SARS-CoV-2

| Simulation time<br>(nanosecond, ns) | Radius of gyration, Rg (Å) |                   |
|-------------------------------------|----------------------------|-------------------|
|                                     | Local simulation           | Global simulation |
| 0.00                                | 23.21                      | 23.32             |
| 0.25                                | 23.49                      | 23.38             |
| 0.5                                 | 23.36                      | 23.28             |
| 0.75                                | 23.51                      | 23.61             |
| 1.00                                | 23.53                      | 23.38             |
| 1.25                                | 23.41                      | 23.29             |
| 1.50                                | 23.39                      | 23.47             |
| 1.75                                | 23.28                      | 23.43             |
| 2.00                                | 23.48                      | 23.29             |
| 2.25                                | 23.59                      | 23.69             |
| 2.50                                | 23.56                      | 23.29             |
| 2.75                                | 23.40                      | 23.54             |
| 3.00                                | 23.39                      | 23.47             |
| 3.25                                | 23.59                      | 23.67             |
| 3.50                                | 23.39                      | 23.35             |
| 3.75                                | 23.39                      | 23.24             |
| 4.00                                | 23.42                      | 23.65             |
| 4.25                                | 23.27                      | 23.41             |
| 4.50                                | 23.20                      | 23.66             |
| 4.75                                | 23.57                      | 23.38             |
| 5.00                                | 23.46                      | 23.45             |
| 5.25                                | 23.50                      | 23.31             |
| 5.50                                | 23.54                      | 23.42             |
| 5.75                                | 23.39                      | 23.61             |
| 6.00                                | 23.46                      | 23.48             |
| 6.25                                | 23.57                      | 23.52             |
| 6.50                                | 23.44                      | 23.43             |
| 6.75                                | 23.38                      | 23.47             |
| 7.00                                | 23.39                      | 23.61             |
| 7.25                                | 23.47                      | 23.35             |
| 7.50                                | 23.45                      | 23.31             |
| 7.75                                | 23.66                      | 23.49             |
| 8.00                                | 23.37                      | 23.48             |
| 8.25                                | 23.53                      | 23.48             |

---

|       |       |       |
|-------|-------|-------|
| 08.5  | 23.56 | 23.49 |
| 8.75  | 23.54 | 23.54 |
| 9.00  | 23.56 | 23.62 |
| 9.25  | 23.51 | 23.36 |
| 9.50  | 23.55 | 23.64 |
| 9.75  | 23.19 | 23.37 |
| 10.0  | 23.34 | 23.41 |
| 10.25 | 23.43 | 23.56 |
| 10.50 | 23.53 | 23.88 |
| 10.75 | 23.86 | 23.56 |
| 11.00 | 23.67 | 23.46 |
| 11.25 | 23.64 | 23.56 |
| 11.50 | 23.82 | 23.48 |
| 11.75 | 23.82 | 23.67 |
| 12.00 | 23.69 | 23.50 |
| 12.25 | 23.72 | 23.49 |
| 12.50 | 23.73 | 23.53 |
| 12.75 | 23.63 | 23.48 |
| 13.00 | 23.68 | 23.62 |
| 13.25 | 23.73 | 23.25 |
| 13.50 | 23.61 | 23.65 |
| 13.75 | 23.54 | 23.51 |
| 14.00 | 23.50 | 23.55 |
| 14.25 | 23.57 | 23.57 |
| 14.5  | 23.55 | 23.33 |
| 14.75 | 23.56 | 23.51 |
| 15.00 | 23.52 | 23.35 |
| 15.25 | 23.64 | 23.46 |
| 15.50 | 23.59 | 23.60 |
| 15.75 | 23.69 | 23.57 |
| 16.00 | 23.61 | 23.63 |
| 16.25 | 23.61 | 23.41 |
| 16.50 | 23.69 | 23.55 |
| 16.75 | 23.66 | 23.54 |
| 17.00 | 23.69 | 23.53 |
| 17.25 | 23.65 | 23.58 |
| 17.50 | 23.45 | 23.43 |
| 17.75 | 23.85 | 23.48 |
| 18.00 | 23.63 | 23.36 |
| 18.25 | 23.91 | 23.48 |
| 18.50 | 23.74 | 23.27 |
| 18.75 | 23.67 | 23.35 |
| 19.00 | 23.78 | 23.42 |
| 19.25 | 23.57 | 23.50 |
| 19.50 | 23.68 | 23.46 |
| 19.75 | 23.66 | 23.52 |
| 20.00 | 23.71 | 23.52 |
| 20.25 | 23.71 | 23.58 |
| 20.50 | 23.79 | 23.48 |
| 20.75 | 23.89 | 23.61 |
| 21.00 | 23.75 | 23.37 |
| 21.25 | 23.77 | 23.58 |
| 21.50 | 23.66 | 23.34 |
| 21.75 | 23.47 | 23.42 |
| 22.00 | 23.72 | 23.42 |
| 22.25 | 23.49 | 23.27 |
| 22.50 | 23.52 | 23.45 |
| 22.75 | 23.31 | 23.57 |
| 23.00 | 23.51 | 23.47 |

---

---

|       |       |       |
|-------|-------|-------|
| 23.25 | 23.62 | 23.54 |
| 23.5  | 23.63 | 23.70 |
| 23.75 | 23.65 | 23.64 |
| 24.00 | 23.47 | 23.57 |
| 24.25 | 23.36 | 23.63 |
| 24.50 | 23.27 | 23.63 |
| 24.75 | 23.24 | 23.49 |
| 25.00 | 23.34 | 23.67 |
| 25.25 | 23.40 | 23.36 |
| 25.50 | 23.48 | 23.39 |
| 25.75 | 23.55 | 23.52 |
| 26.00 | 23.35 | 23.59 |
| 26.25 | 23.39 | 23.45 |
| 26.50 | 23.32 | 23.48 |
| 26.75 | 23.42 | 23.54 |
| 27.00 | 23.39 | 23.53 |
| 27.25 | 23.43 | 23.50 |
| 27.50 | 23.21 | 23.55 |
| 27.75 | 23.39 | 23.62 |
| 28.00 | 23.50 | 23.55 |
| 28.25 | 23.21 | 23.60 |
| 28.50 | 23.53 | 23.55 |
| 28.75 | 23.57 | 23.35 |
| 29.00 | 23.72 | 23.38 |
| 29.25 | 23.52 | 23.44 |
| 29.50 | 23.60 | 23.39 |
| 29.75 | 23.85 | 23.33 |
| 30.00 | 23.65 | 23.35 |
| 30.25 | 23.76 | 23.39 |
| 30.50 | 23.73 | 23.61 |
| 30.75 | 23.66 | 23.53 |
| 31.00 | 23.59 | 23.86 |
| 31.25 | 23.72 | 23.59 |
| 31.50 | 23.62 | 23.44 |
| 31.75 | 23.58 | 23.62 |
| 32.00 | 23.82 | 23.44 |
| 32.25 | 23.42 | 23.55 |
| 32.50 | 23.76 | 23.59 |
| 32.75 | 23.61 | 23.49 |
| 33.00 | 23.65 | 23.70 |
| 33.25 | 23.66 | 23.59 |
| 33.50 | 23.96 | 23.56 |
| 33.75 | 23.72 | 23.71 |
| 34.00 | 23.76 | 23.63 |
| 34.25 | 23.74 | 23.55 |
| 34.50 | 23.85 | 23.64 |
| 34.75 | 23.83 | 23.64 |
| 35.00 | 23.95 | 23.77 |
| 35.25 | 24.07 | 23.58 |
| 35.50 | 24.02 | 23.53 |
| 35.75 | 23.90 | 23.65 |
| 36.00 | 23.88 | 23.47 |
| 36.25 | 23.88 | 23.46 |
| 36.50 | 23.91 | 23.63 |
| 36.75 | 23.87 | 23.54 |
| 37.00 | 23.82 | 23.63 |
| 37.25 | 23.68 | 23.37 |
| 37.50 | 23.79 | 23.46 |
| 37.75 | 23.84 | 23.53 |

---

|       |       |       |
|-------|-------|-------|
| 38.00 | 23.75 | 23.34 |
| 38.25 | 23.79 | 23.34 |
| 38.50 | 23.78 | 23.60 |
| 38.75 | 23.82 | 23.51 |
| 39.00 | 23.72 | 23.76 |
| 39.25 | 23.86 | 23.63 |
| 39.50 | 23.82 | 23.55 |
| 39.75 | 23.70 | 23.57 |
| 40.00 | 23.64 | 23.57 |
| 40.25 | 24.01 | 23.47 |
| 40.50 | 23.86 | 23.42 |
| 40.75 | 23.86 | 23.48 |
| 41.00 | 23.91 | 23.65 |
| 41.25 | 23.91 | 23.46 |
| 41.50 | 23.81 | 23.40 |
| 41.75 | 23.76 | 23.49 |
| 42.00 | 23.53 | 23.36 |
| 42.25 | 23.85 | 23.40 |
| 42.50 | 23.83 | 23.57 |
| 42.75 | 23.85 | 23.61 |
| 43.00 | 23.77 | 23.67 |
| 43.25 | 23.76 | 23.65 |
| 43.50 | 23.75 | 23.73 |
| 43.75 | 23.47 | 23.64 |
| 44.00 | 23.64 | 23.51 |
| 44.25 | 23.69 | 23.69 |
| 44.50 | 23.77 | 23.55 |
| 44.75 | 23.72 | 23.73 |
| 45.00 | 23.91 | 23.48 |
| 45.25 | 23.66 | 23.60 |
| 45.50 | 23.88 | 23.95 |
| 45.75 | 23.93 | 23.68 |
| 46.00 | 23.97 | 23.54 |
| 46.25 | 23.83 | 23.69 |
| 46.50 | 23.91 | 23.48 |
| 46.75 | 23.94 | 23.37 |
| 47.00 | 23.91 | 23.29 |
| 47.25 | 23.88 | 23.49 |
| 47.50 | 23.80 | 23.64 |
| 47.75 | 23.67 | 23.47 |
| 48.00 | 23.83 | 23.43 |
| 48.25 | 23.69 | 23.32 |
| 48.50 | 23.72 | 23.44 |
| 48.75 | 23.85 | 23.26 |
| 49.00 | 23.89 | 23.46 |
| 49.25 | 23.79 | 23.39 |
| 49.50 | 23.99 | 23.38 |
| 49.75 | 23.76 | 23.45 |
| 50.00 | 23.87 | 23.54 |

**Table S6:** The Radius of gyration (Rg) values of Global and Local simulation between hesperidin and PL-Pro (Hes + PL-Pro) of SARS-CoV-2



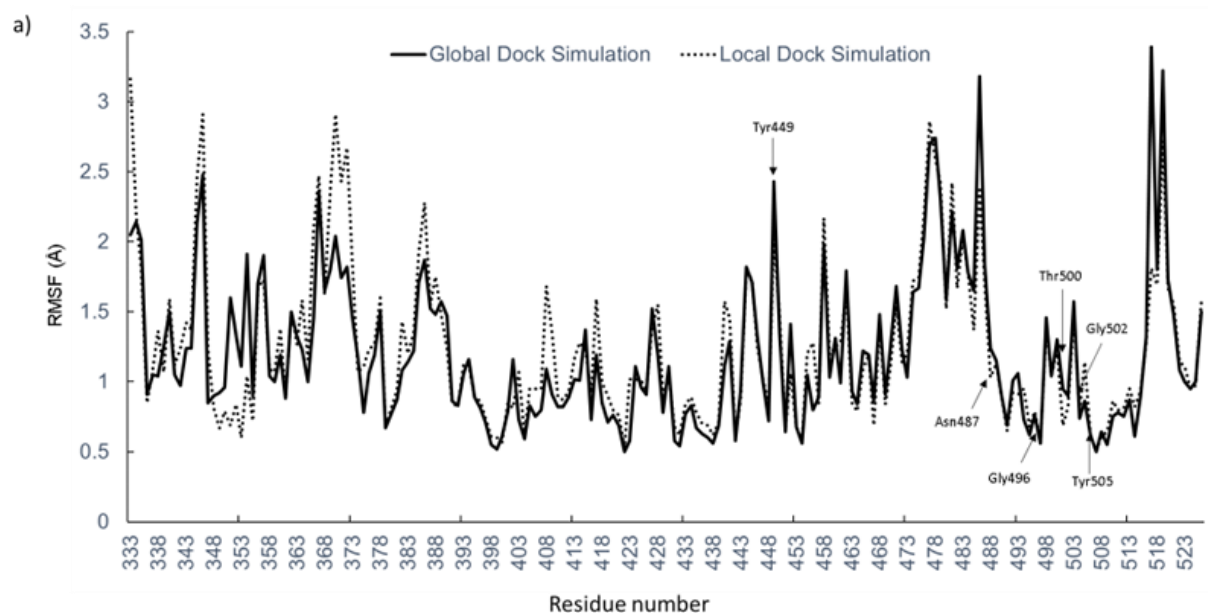

**Figure S7:** Root Mean Square Fluctuation (RMSF) of hesperidin and RBD S protein (Hes + RBD S protein) on Global and Local docking of SARS-CoV-2

| Residue number |     | Root-mean square fluctuation, RMSF (Å) |                   |
|----------------|-----|----------------------------------------|-------------------|
|                |     | Local simulation                       | Global simulation |
| THR            | 333 | 3.16                                   | 2.05              |
| ASN            | 334 | 2.19                                   | 2.14              |
| LEU            | 335 | 1.80                                   | 2.01              |
| CYS            | 336 | 0.85                                   | 0.91              |
| PRO            | 337 | 1.09                                   | 1.05              |
| PHE            | 338 | 1.36                                   | 1.04              |
| GLY            | 339 | 1.07                                   | 1.25              |
| GLU            | 340 | 1.59                                   | 1.50              |
| VAL            | 341 | 1.12                                   | 1.05              |
| PHE            | 342 | 1.24                                   | 0.97              |
| ASN            | 343 | 1.42                                   | 1.24              |
| ALA            | 344 | 1.37                                   | 1.24              |
| THR            | 345 | 2.45                                   | 2.13              |
| ARG            | 346 | 2.91                                   | 2.48              |
| PHE            | 347 | 1.24                                   | 0.85              |
| ALA            | 348 | 0.81                                   | 0.90              |
| SER            | 349 | 0.67                                   | 0.92              |
| VAL            | 350 | 0.79                                   | 0.96              |
| TYR            | 351 | 0.69                                   | 1.60              |
| ALA            | 352 | 0.84                                   | 1.33              |
| TRP            | 353 | 0.60                                   | 1.11              |
| ASN            | 354 | 1.04                                   | 1.91              |
| ARG            | 355 | 0.72                                   | 0.90              |
| LYS            | 356 | 1.67                                   | 1.7               |
| ARG            | 357 | 1.73                                   | 1.9               |
| ILE            | 358 | 1.09                                   | 1.04              |
| SER            | 359 | 1.07                                   | 1.00              |
| ASN            | 360 | 1.38                                   | 1.19              |
| CYS            | 361 | 0.88                                   | 0.88              |

---

|     |     |      |      |
|-----|-----|------|------|
| VAL | 362 | 1.50 | 1.5  |
| ALA | 363 | 1.27 | 1.32 |
| ASP | 364 | 1.58 | 1.23 |
| TYR | 365 | 1.16 | 1.00 |
| SER | 366 | 2.10 | 1.46 |
| VAL | 367 | 2.47 | 2.36 |
| LEU | 368 | 1.62 | 1.65 |
| TYR | 369 | 2.37 | 1.8  |
| ASN | 370 | 2.91 | 2.04 |
| SER | 371 | 2.43 | 1.74 |
| ALA | 372 | 2.67 | 1.82 |
| SER | 373 | 1.88 | 1.47 |
| PHE | 374 | 1.07 | 1.17 |
| SER | 375 | 1.11 | 0.78 |
| THR | 376 | 1.23 | 1.06 |
| PHE | 377 | 1.27 | 1.19 |
| LYS | 378 | 1.60 | 1.50 |
| CYS | 379 | 0.69 | 0.67 |
| TYR | 380 | 0.81 | 0.77 |
| GLY | 381 | 0.94 | 0.87 |
| VAL | 382 | 1.43 | 1.08 |
| SER | 383 | 1.20 | 1.14 |
| PRO | 384 | 1.35 | 1.22 |
| THR | 385 | 1.92 | 1.71 |
| LYS | 386 | 2.28 | 1.87 |
| LEU | 387 | 1.55 | 1.52 |
| ASN | 388 | 1.75 | 1.48 |
| ASP | 389 | 1.48 | 1.57 |
| LEU | 390 | 1.24 | 1.47 |
| CYS | 391 | 0.85 | 0.86 |
| PHE | 392 | 0.82 | 0.83 |
| THR | 393 | 1.13 | 1.06 |
| ASN | 394 | 1.12 | 1.16 |
| VAL | 395 | 0.89 | 0.89 |
| TYR | 396 | 0.86 | 0.81 |
| ALA | 397 | 0.74 | 0.71 |
| ASP | 398 | 0.61 | 0.55 |
| SER | 399 | 0.60 | 0.52 |
| PHE | 400 | 0.57 | 0.61 |
| VAL | 401 | 0.85 | 0.79 |
| ILE | 402 | 0.81 | 1.16 |
| ARG | 403 | 1.07 | 0.73 |
| GLY | 404 | 0.62 | 0.59 |
| ASP | 405 | 0.95 | 0.83 |
| GLU | 406 | 0.95 | 0.75 |
| VAL | 407 | 0.95 | 0.80 |
| ARG | 408 | 1.68 | 1.09 |
| GLN | 409 | 1.35 | 0.91 |
| ILE | 410 | 0.89 | 0.82 |
| ALA | 411 | 0.87 | 0.82 |
| PRO | 412 | 0.93 | 0.89 |
| GLY | 413 | 1.17 | 1.02 |
| GLN | 414 | 1.28 | 1.01 |
| THR | 415 | 1.23 | 1.37 |
| GLY | 416 | 0.92 | 0.73 |
| LYS | 417 | 1.59 | 1.19 |
| ILE | 418 | 0.99 | 0.85 |
| ALA | 419 | 0.90 | 0.71 |
| ASP | 420 | 0.80 | 0.76 |

---

---

|     |     |      |      |
|-----|-----|------|------|
| TYR | 421 | 0.76 | 0.69 |
| ASN | 422 | 0.53 | 0.50 |
| TYR | 423 | 1.02 | 0.58 |
| LYS | 424 | 1.02 | 1.11 |
| LEU | 425 | 1.01 | 0.96 |
| PRO | 426 | 0.94 | 0.91 |
| ASP | 427 | 1.39 | 1.52 |
| ASP | 428 | 1.55 | 1.19 |
| PHE | 429 | 0.90 | 0.78 |
| THR | 430 | 1.03 | 1.11 |
| GLY | 431 | 0.68 | 0.58 |
| CYS | 432 | 0.62 | 0.54 |
| VAL | 433 | 0.84 | 0.77 |
| ILE | 434 | 0.89 | 0.83 |
| ALA | 435 | 0.78 | 0.67 |
| TRP | 436 | 0.70 | 0.63 |
| ASN | 437 | 0.69 | 0.60 |
| SER | 438 | 0.62 | 0.56 |
| ASN | 439 | 0.71 | 0.69 |
| ASN | 440 | 1.57 | 1.11 |
| LEU | 441 | 1.46 | 1.29 |
| ASP | 442 | 0.61 | 0.58 |
| SER | 443 | 0.86 | 0.93 |
| LYS | 444 | 1.79 | 1.82 |
| VAL | 445 | 1.73 | 1.71 |
| GLY | 446 | 1.26 | 1.33 |
| GLY | 447 | 1.02 | 1.00 |
| ASN | 448 | 0.84 | 0.72 |
| TYR | 449 | 2.02 | 2.43 |
| ASN | 450 | 1.47 | 1.35 |
| TYR | 451 | 0.66 | 0.64 |
| LEU | 452 | 1.06 | 1.41 |
| TYR | 453 | 0.68 | 0.68 |
| ARG | 454 | 0.58 | 0.56 |
| LEU | 455 | 1.20 | 1.05 |
| PHE | 456 | 1.28 | 0.80 |
| ARG | 457 | 0.85 | 0.89 |
| LYS | 458 | 2.17 | 1.98 |
| SER | 459 | 1.19 | 1.03 |
| ASN | 460 | 1.25 | 1.31 |
| LEU | 461 | 1.28 | 0.99 |
| LYS | 462 | 1.64 | 1.79 |
| PRO | 463 | 0.85 | 0.93 |
| PHE | 464 | 0.79 | 0.84 |
| GLU | 465 | 1.09 | 1.22 |
| ARG | 466 | 1.19 | 1.19 |
| ASP | 467 | 0.69 | 0.86 |
| ILE | 468 | 1.41 | 1.48 |
| SER | 469 | 0.84 | 0.91 |
| THR | 470 | 1.11 | 1.25 |
| GLU | 471 | 1.54 | 1.68 |
| ILE | 472 | 1.14 | 1.23 |
| TYR | 473 | 1.2  | 1.03 |
| GLN | 474 | 1.72 | 1.64 |
| ALA | 475 | 1.74 | 1.67 |
| GLY | 476 | 2.17 | 2.02 |
| SER | 477 | 2.86 | 2.70 |
| THR | 478 | 2.59 | 2.74 |
| PRO | 479 | 2.42 | 2.3  |

---

|     |     |      |      |
|-----|-----|------|------|
| CYS | 480 | 1.52 | 1.58 |
| ASN | 481 | 2.42 | 2.22 |
| GLY | 482 | 1.67 | 1.81 |
| VAL | 483 | 2.03 | 2.08 |
| GLU | 484 | 1.78 | 1.78 |
| GLY | 485 | 1.37 | 1.65 |
| PHE | 486 | 2.37 | 3.18 |
| ASN | 487 | 1.70 | 1.84 |
| CYS | 488 | 1.03 | 1.24 |
| TYR | 489 | 1.13 | 1.15 |
| PHE | 490 | 0.90 | 0.91 |
| PRO | 491 | 0.65 | 0.69 |
| LEU | 492 | 0.92 | 1.01 |
| GLN | 493 | 0.91 | 1.06 |
| SER | 494 | 0.95 | 0.73 |
| TYR | 495 | 0.68 | 0.62 |
| GLY | 496 | 0.79 | 0.76 |
| PHE | 497 | 0.58 | 0.56 |
| GLN | 498 | 1.39 | 1.46 |
| PRO | 499 | 1.04 | 1.04 |
| THR | 500 | 1.23 | 1.30 |
| ASN | 501 | 0.69 | 0.95 |
| GLY | 502 | 0.82 | 0.90 |
| VAL | 503 | 1.47 | 1.57 |
| GLY | 504 | 0.79 | 0.74 |
| TYR | 505 | 1.14 | 0.86 |
| GLN | 506 | 0.62 | 0.62 |
| PRO | 507 | 0.50 | 0.50 |
| TYR | 508 | 0.61 | 0.64 |
| ARG | 509 | 0.64 | 0.55 |
| VAL | 510 | 0.86 | 0.75 |
| VAL | 511 | 0.80 | 0.78 |
| VAL | 512 | 0.81 | 0.75 |
| LEU | 513 | 0.95 | 0.87 |
| SER | 514 | 0.82 | 0.61 |
| PHE | 515 | 0.93 | 0.89 |
| GLU | 516 | 1.28 | 1.32 |
| LEU | 517 | 1.81 | 3.39 |
| LEU | 518 | 1.69 | 1.80 |
| HIS | 519 | 2.72 | 3.22 |
| ALA | 520 | 1.67 | 1.73 |
| PRO | 521 | 1.55 | 1.47 |
| ALA | 522 | 1.14 | 1.08 |
| THR | 523 | 1.11 | 1.00 |
| VAL | 524 | 0.95 | 0.95 |
| CYS | 525 | 0.97 | 1.00 |
| GLY | 526 | 1.57 | 1.50 |

**Table S7:** The Root-mean square fluctuation (RMSF) values of Global and Local simulation between hesperidin and RBD S protein (Hes + RBD S protein) of SARS-CoV-2

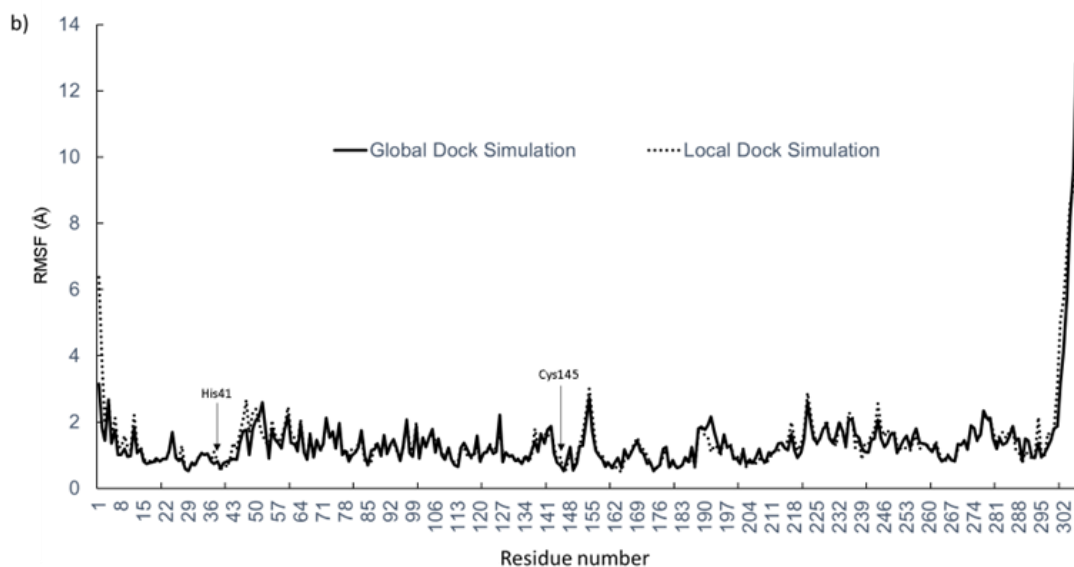

**Figure S8:** Root Mean Square Fluctuation (RMSF) of hesperidin and 3CL-Pro (Hes + 3CL-Pro) on Global and Local docking of SARS-CoV-2

| Residue number |    | Root-mean square fluctuation, RMSF (Å) |                   |
|----------------|----|----------------------------------------|-------------------|
|                |    | Local simulation                       | Global simulation |
| SER            | 1  | 6.38                                   | 3.15              |
| GLY            | 2  | 3.84                                   | 1.84              |
| PHE            | 3  | 1.96                                   | 1.45              |
| ARG            | 4  | 2.72                                   | 2.66              |
| LYS            | 5  | 1.61                                   | 1.35              |
| MET            | 6  | 2.13                                   | 1.76              |
| ALA            | 7  | 1.29                                   | 1.01              |
| PHE            | 8  | 1.22                                   | 1.02              |
| PRO            | 9  | 1.58                                   | 1.20              |
| SER            | 10 | 1.25                                   | 0.96              |
| GLY            | 11 | 1.15                                   | 0.97              |
| LYS            | 12 | 2.22                                   | 1.85              |
| VAL            | 13 | 1.32                                   | 1.07              |
| GLU            | 14 | 1.26                                   | 1.20              |
| GLY            | 15 | 0.91                                   | 0.81              |
| CYS            | 16 | 0.80                                   | 0.75              |
| MET            | 17 | 0.83                                   | 0.78              |
| VAL            | 18 | 0.80                                   | 0.80              |
| GLN            | 19 | 0.81                                   | 0.91              |
| VAL            | 20 | 0.82                                   | 0.81              |
| THR            | 21 | 0.87                                   | 0.88              |
| CYS            | 22 | 0.91                                   | 0.88              |
| GLY            | 23 | 1.12                                   | 1.15              |
| THR            | 24 | 1.66                                   | 1.69              |
| THR            | 25 | 1.00                                   | 0.92              |
| THR            | 26 | 0.87                                   | 0.83              |
| LEU            | 27 | 1.29                                   | 0.91              |
| ASN            | 28 | 0.55                                   | 0.58              |
| GLY            | 29 | 0.54                                   | 0.53              |
| LEU            | 30 | 0.79                                   | 0.77              |
| TRP            | 31 | 0.65                                   | 0.71              |

---

|     |    |      |      |
|-----|----|------|------|
| LEU | 32 | 0.93 | 0.89 |
| ASP | 33 | 1.05 | 1.07 |
| ASP | 34 | 1.01 | 1.01 |
| VAL | 35 | 1.05 | 1.04 |
| VAL | 36 | 0.81 | 0.82 |
| TYR | 37 | 1.11 | 0.74 |
| CYS | 38 | 0.82 | 0.82 |
| PRO | 39 | 0.50 | 0.60 |
| ARG | 40 | 0.79 | 0.76 |
| HIS | 41 | 0.63 | 0.82 |
| VAL | 42 | 0.89 | 0.85 |
| ILE | 43 | 1.38 | 0.89 |
| CYS | 44 | 1.17 | 0.87 |
| THR | 45 | 1.66 | 1.36 |
| SER | 46 | 2.09 | 1.73 |
| GLU | 47 | 2.66 | 1.77 |
| ASP | 48 | 1.67 | 1.01 |
| MET | 49 | 2.29 | 1.80 |
| LEU | 50 | 2.40 | 2.06 |
| ASN | 51 | 2.03 | 2.15 |
| PRO | 52 | 1.57 | 2.60 |
| ASN | 53 | 1.48 | 1.82 |
| TYR | 54 | 1.14 | 0.90 |
| GLU | 55 | 2.05 | 1.80 |
| ASP | 56 | 1.66 | 1.48 |
| LEU | 57 | 1.38 | 1.36 |
| LEU | 58 | 1.56 | 1.21 |
| ILE | 59 | 1.82 | 1.74 |
| ARG | 60 | 2.45 | 2.20 |
| LYS | 61 | 1.65 | 1.38 |
| SER | 62 | 1.51 | 1.34 |
| ASN | 63 | 1.30 | 1.12 |
| HIS | 64 | 2.08 | 1.96 |
| ASN | 65 | 1.13 | 1.09 |
| PHE | 66 | 0.96 | 0.87 |
| LEU | 67 | 1.65 | 1.60 |
| VAL | 68 | 0.91 | 0.94 |
| GLN | 69 | 1.48 | 1.46 |
| ALA | 70 | 1.11 | 1.16 |
| GLY | 71 | 1.36 | 1.34 |
| ASN | 72 | 2.06 | 2.12 |
| VAL | 73 | 1.50 | 1.54 |
| GLN | 74 | 1.68 | 1.71 |
| LEU | 75 | 1.20 | 1.21 |
| ARG | 76 | 1.92 | 1.96 |
| VAL | 77 | 1.03 | 1.01 |
| ILE | 78 | 1.19 | 1.12 |
| GLY | 79 | 0.95 | 0.81 |
| HIS | 80 | 1.20 | 0.99 |
| SER | 81 | 1.12 | 1.08 |
| MET | 82 | 1.36 | 1.24 |
| GLN | 83 | 1.61 | 1.75 |
| ASN | 84 | 0.80 | 0.95 |
| CYS | 85 | 0.69 | 0.71 |
| VAL | 86 | 0.83 | 1.15 |
| LEU | 87 | 1.32 | 1.17 |
| LYS | 88 | 1.30 | 1.36 |
| LEU | 89 | 1.06 | 0.98 |
| LYS | 90 | 1.51 | 1.60 |

---

---

|     |     |      |      |
|-----|-----|------|------|
| VAL | 91  | 1.02 | 1.04 |
| ASP | 92  | 1.33 | 1.33 |
| THR | 93  | 1.37 | 1.48 |
| ALA | 94  | 1.10 | 1.15 |
| ASN | 95  | 0.83 | 0.84 |
| PRO | 96  | 1.23 | 1.27 |
| LYS | 97  | 2.00 | 2.07 |
| THR | 98  | 1.34 | 1.06 |
| PRO | 99  | 1.03 | 0.96 |
| LYS | 100 | 1.98 | 1.87 |
| TYR | 101 | 0.93 | 0.91 |
| LYS | 102 | 1.54 | 1.53 |
| PHE | 103 | 1.28 | 1.25 |
| VAL | 104 | 1.48 | 1.52 |
| ARG | 105 | 1.69 | 1.78 |
| ILE | 106 | 1.43 | 1.08 |
| GLN | 107 | 1.41 | 1.49 |
| PRO | 108 | 1.11 | 1.00 |
| GLY | 109 | 0.89 | 0.86 |
| GLN | 110 | 1.20 | 1.23 |
| THR | 111 | 0.88 | 0.87 |
| PHE | 112 | 0.78 | 0.71 |
| SER | 113 | 0.82 | 0.65 |
| VAL | 114 | 1.25 | 1.23 |
| LEU | 115 | 1.21 | 1.38 |
| ALA | 116 | 0.97 | 1.15 |
| CYS | 117 | 0.91 | 0.96 |
| TYR | 118 | 0.95 | 1.04 |
| ASN | 119 | 1.33 | 1.59 |
| GLY | 120 | 0.78 | 0.82 |
| SER | 121 | 1.10 | 1.06 |
| PRO | 122 | 1.09 | 1.08 |
| SER | 123 | 1.35 | 1.29 |
| GLY | 124 | 1.11 | 1.04 |
| VAL | 125 | 1.24 | 1.10 |
| TYR | 126 | 1.70 | 2.22 |
| GLN | 127 | 1.07 | 0.80 |
| CYS | 128 | 1.08 | 1.08 |
| ALA | 129 | 0.97 | 0.96 |
| MET | 130 | 1.00 | 0.99 |
| ARG | 131 | 0.81 | 0.83 |
| PRO | 132 | 0.92 | 0.85 |
| ASN | 133 | 0.78 | 0.74 |
| PHE | 134 | 1.01 | 0.95 |
| THR | 135 | 0.85 | 0.83 |
| ILE | 136 | 0.92 | 1.10 |
| LYS | 137 | 1.80 | 1.43 |
| GLY | 138 | 1.21 | 1.11 |
| SER | 139 | 1.68 | 1.64 |
| PHE | 140 | 1.65 | 1.35 |
| LEU | 141 | 1.54 | 1.77 |
| ASN | 142 | 1.79 | 1.88 |
| GLY | 143 | 1.24 | 1.07 |
| SER | 144 | 0.86 | 0.78 |
| CYS | 145 | 0.94 | 0.68 |
| GLY | 146 | 0.50 | 0.52 |
| SER | 147 | 0.58 | 0.82 |
| VAL | 148 | 1.22 | 1.25 |
| GLY | 149 | 0.60 | 0.55 |

---

---

|     |     |      |      |
|-----|-----|------|------|
| PHE | 150 | 0.94 | 0.76 |
| ASN | 151 | 1.33 | 1.28 |
| ILE | 152 | 1.62 | 1.28 |
| ASP | 153 | 2.33 | 2.05 |
| TYR | 154 | 3.00 | 2.74 |
| ASP | 155 | 2.21 | 1.73 |
| CYS | 156 | 1.23 | 1.13 |
| VAL | 157 | 1.05 | 0.99 |
| SER | 158 | 1.00 | 0.87 |
| PHE | 159 | 0.71 | 0.66 |
| CYS | 160 | 0.81 | 0.78 |
| TYR | 161 | 0.58 | 0.61 |
| MET | 162 | 0.70 | 0.77 |
| HIS | 163 | 0.55 | 0.93 |
| HIS | 164 | 0.51 | 0.62 |
| MET | 165 | 0.86 | 1.17 |
| GLU | 166 | 0.97 | 0.91 |
| LEU | 167 | 1.11 | 1.07 |
| PRO | 168 | 1.35 | 1.27 |
| THR | 169 | 1.54 | 1.42 |
| GLY | 170 | 1.19 | 1.12 |
| VAL | 171 | 1.18 | 1.05 |
| HIS | 172 | 1.00 | 0.75 |
| ALA | 173 | 0.77 | 0.80 |
| GLY | 174 | 0.51 | 0.53 |
| THR | 175 | 0.62 | 0.64 |
| ASP | 176 | 0.67 | 0.69 |
| LEU | 177 | 0.98 | 1.19 |
| GLU | 178 | 1.25 | 1.25 |
| GLY | 179 | 0.59 | 0.63 |
| ASN | 180 | 0.77 | 0.85 |
| PHE | 181 | 0.62 | 0.65 |
| TYR | 182 | 0.61 | 0.63 |
| GLY | 183 | 0.71 | 0.70 |
| PRO | 184 | 0.93 | 0.94 |
| PHE | 185 | 0.75 | 0.79 |
| VAL | 186 | 1.09 | 1.25 |
| ASP | 187 | 0.64 | 0.68 |
| ARG | 188 | 1.70 | 1.80 |
| GLN | 189 | 1.82 | 1.85 |
| THR | 190 | 1.58 | 1.77 |
| ALA | 191 | 1.53 | 1.91 |
| GLN | 192 | 1.11 | 2.16 |
| ALA | 193 | 1.30 | 1.67 |
| ALA | 194 | 1.23 | 1.35 |
| GLY | 195 | 0.98 | 1.09 |
| THR | 196 | 1.57 | 1.62 |
| ASP | 197 | 1.23 | 1.24 |
| THR | 198 | 1.33 | 1.29 |
| THR | 199 | 0.95 | 0.89 |
| ILE | 200 | 1.02 | 0.90 |
| THR | 201 | 0.81 | 0.74 |
| VAL | 202 | 1.20 | 1.16 |
| ASN | 203 | 0.65 | 0.73 |
| VAL | 204 | 0.77 | 0.86 |
| LEU | 205 | 0.75 | 0.76 |
| ALA | 206 | 0.76 | 0.95 |
| TRP | 207 | 0.88 | 1.20 |
| LEU | 208 | 0.83 | 0.87 |

---



---

|     |     |      |      |
|-----|-----|------|------|
| TYR | 209 | 0.72 | 0.8  |
| ALA | 210 | 0.88 | 1.09 |
| ALA | 211 | 1.01 | 1.04 |
| VAL | 212 | 1.17 | 1.14 |
| ILE | 213 | 1.13 | 1.35 |
| ASN | 214 | 1.27 | 1.37 |
| GLY | 215 | 1.37 | 1.21 |
| ASP | 216 | 1.42 | 1.15 |
| ARG | 217 | 2.00 | 1.64 |
| TRP | 218 | 1.48 | 1.16 |
| PHE | 219 | 1.14 | 0.93 |
| LEU | 220 | 1.34 | 1.08 |
| ASN | 221 | 1.66 | 1.48 |
| ARG | 222 | 2.89 | 2.59 |
| PHE | 223 | 2.25 | 2.00 |
| THR | 224 | 1.69 | 1.49 |
| THR | 225 | 1.31 | 1.38 |
| THR | 226 | 1.54 | 1.52 |
| LEU | 227 | 1.78 | 1.78 |
| ASN | 228 | 2.05 | 1.93 |
| ASP | 229 | 1.55 | 1.50 |
| PHE | 230 | 1.42 | 1.35 |
| ASN | 231 | 1.29 | 1.63 |
| LEU | 232 | 2.03 | 1.99 |
| VAL | 233 | 1.69 | 1.71 |
| ALA | 234 | 1.25 | 1.28 |
| MET | 235 | 2.28 | 2.07 |
| LYS | 236 | 2.18 | 2.08 |
| TYR | 237 | 1.23 | 1.63 |
| ASN | 238 | 1.53 | 1.54 |
| TYR | 239 | 0.86 | 1.23 |
| GLU | 240 | 1.35 | 1.11 |
| PRO | 241 | 1.33 | 1.08 |
| LEU | 242 | 1.64 | 1.46 |
| THR | 243 | 1.72 | 1.50 |
| GLN | 244 | 2.56 | 2.08 |
| ASP | 245 | 1.85 | 1.51 |
| HIS | 246 | 1.56 | 1.25 |
| VAL | 247 | 1.74 | 1.38 |
| ASP | 248 | 1.63 | 1.63 |
| ILE | 249 | 1.75 | 1.66 |
| LEU | 250 | 1.30 | 1.06 |
| GLY | 251 | 1.19 | 1.24 |
| PRO | 252 | 1.27 | 1.47 |
| LEU | 253 | 1.19 | 1.59 |
| SER | 254 | 1.14 | 1.23 |
| ALA | 255 | 1.44 | 1.58 |
| GLN | 256 | 1.58 | 1.80 |
| THR | 257 | 1.19 | 1.38 |
| GLY | 258 | 1.29 | 1.35 |
| ILE | 259 | 1.39 | 1.33 |
| ALA | 260 | 1.22 | 1.19 |
| VAL | 261 | 1.16 | 1.11 |
| LEU | 262 | 1.42 | 1.33 |
| ASP | 263 | 1.11 | 0.96 |
| MET | 264 | 0.86 | 0.82 |
| CYS | 265 | 0.80 | 0.89 |
| ALA | 266 | 1.05 | 0.98 |
| SER | 267 | 0.85 | 0.85 |

---

|     |     |       |       |
|-----|-----|-------|-------|
| LEU | 268 | 0.81  | 0.83  |
| LYS | 269 | 1.21  | 1.34  |
| GLU | 270 | 1.34  | 1.32  |
| LEU | 271 | 1.46  | 1.45  |
| LEU | 272 | 1.15  | 1.18  |
| GLN | 273 | 1.87  | 1.89  |
| ASN | 274 | 1.87  | 1.82  |
| GLY | 275 | 1.42  | 1.46  |
| MET | 276 | 1.65  | 1.63  |
| ASN | 277 | 2.24  | 2.34  |
| GLY | 278 | 2.05  | 2.10  |
| ARG | 279 | 2.08  | 2.12  |
| THR | 280 | 1.73  | 1.50  |
| ILE | 281 | 1.32  | 1.20  |
| LEU | 282 | 1.63  | 1.52  |
| GLY | 283 | 1.70  | 1.32  |
| SER | 284 | 1.51  | 1.38  |
| ALA | 285 | 1.70  | 1.55  |
| LEU | 286 | 1.84  | 1.87  |
| LEU | 287 | 1.17  | 1.44  |
| GLU | 288 | 1.11  | 1.49  |
| ASP | 289 | 0.76  | 0.81  |
| GLU | 290 | 1.11  | 1.50  |
| PHE | 291 | 1.03  | 1.44  |
| THR | 292 | 0.90  | 0.94  |
| PRO | 293 | 0.91  | 0.93  |
| PHE | 294 | 2.14  | 1.38  |
| ASP | 295 | 0.96  | 0.94  |
| VAL | 296 | 0.96  | 1.04  |
| VAL | 297 | 1.68  | 1.27  |
| ARG | 298 | 1.55  | 1.47  |
| GLN | 299 | 1.74  | 1.81  |
| CYS | 300 | 3.13  | 1.88  |
| SER | 301 | 5.11  | 3.19  |
| GLY | 302 | 5.66  | 4.12  |
| VAL | 303 | 7.18  | 5.82  |
| THR | 304 | 8.58  | 8.17  |
| PHE | 305 | 9.04  | 9.64  |
| GLN | 306 | 11.11 | 12.84 |

**Table S8:** The Root-mean square fluctuation (RMSF) values of Global and Local simulation between hesperidin and 3CL-Pro (Hes + 3CL-Pro) of SARS-CoV-2

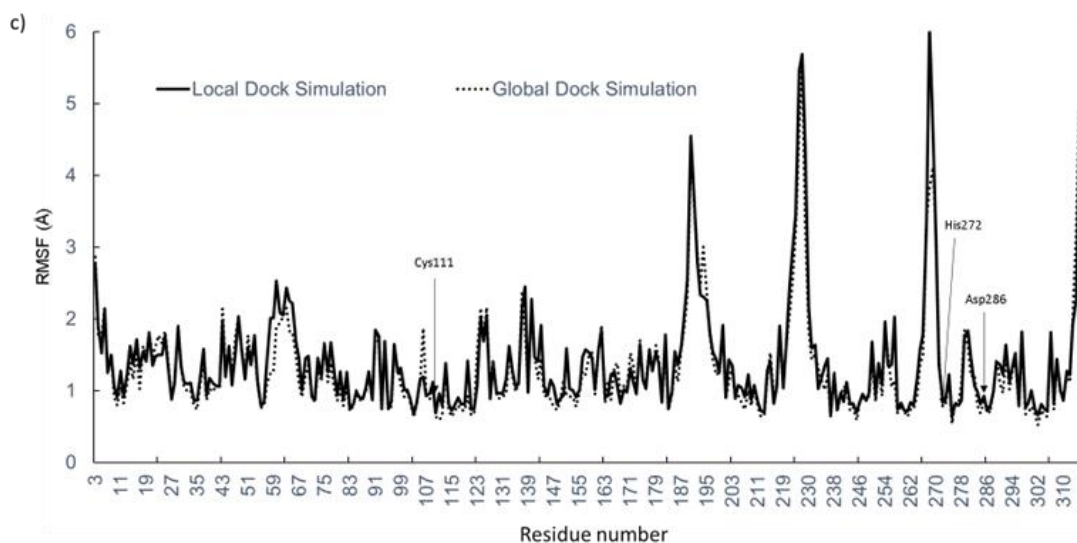

**Figure S9:** Root Mean Square Fluctuation (RMSF) of hesperidin and PL-Pro (Hes + PL-Pro) on Global and Local docking of SARS-CoV-2

| Residue number |    | Root-mean square fluctuation, RMSF (Å) |                   |
|----------------|----|----------------------------------------|-------------------|
|                |    | Local simulation                       | Global simulation |
| ARG            | 3  | 2.77                                   | 2.86              |
| THR            | 4  | 1.90                                   | 1.79              |
| ILE            | 5  | 1.52                                   | 1.78              |
| LYS            | 6  | 2.14                                   | 2.16              |
| VAL            | 7  | 1.25                                   | 1.25              |
| PHE            | 8  | 1.50                                   | 1.51              |
| THR            | 9  | 1.05                                   | 0.92              |
| THR            | 10 | 0.91                                   | 0.80              |
| VAL            | 11 | 1.28                                   | 1.05              |
| ASP            | 12 | 0.92                                   | 0.83              |
| ASN            | 13 | 1.24                                   | 1.12              |
| ILE            | 14 | 1.62                                   | 1.39              |
| ASN            | 15 | 1.37                                   | 1.16              |
| LEU            | 16 | 1.71                                   | 1.56              |
| HIS            | 17 | 1.32                                   | 1.03              |
| THR            | 18 | 1.55                                   | 1.62              |
| GLN            | 19 | 1.41                                   | 1.44              |
| VAL            | 20 | 1.80                                   | 1.81              |
| VAL            | 21 | 1.35                                   | 1.48              |
| ASP            | 22 | 1.48                                   | 1.62              |
| MET            | 23 | 1.50                                   | 1.77              |
| SER            | 24 | 1.50                                   | 1.66              |
| MET            | 25 | 1.76                                   | 1.83              |
| THR            | 26 | 1.27                                   | 1.33              |
| TYR            | 27 | 0.88                                   | 0.91              |
| GLY            | 28 | 1.11                                   | 1.09              |
| GLN            | 29 | 1.88                                   | 1.92              |
| GLN            | 30 | 1.34                                   | 1.35              |
| PHE            | 31 | 1.12                                   | 1.05              |
| GLY            | 32 | 1.09                                   | 0.99              |
| PRO            | 33 | 1.11                                   | 1.00              |
| THR            | 34 | 0.86                                   | 0.79              |
| TYR            | 35 | 0.86                                   | 0.74              |
| LEU            | 36 | 1.16                                   | 1.08              |
| ASP            | 37 | 1.58                                   | 1.40              |

|     |    |      |      |
|-----|----|------|------|
| GLY | 38 | 0.93 | 0.87 |
| ALA | 39 | 1.18 | 1.03 |
| ASP | 40 | 1.10 | 0.99 |
| VAL | 41 | 1.07 | 1.08 |
| THR | 42 | 1.06 | 1.03 |
| LYS | 43 | 1.97 | 2.14 |
| ILE | 44 | 1.19 | 1.28 |
| LYS | 45 | 1.62 | 1.62 |
| PRO | 46 | 1.08 | 1.19 |
| HIS | 47 | 1.55 | 1.76 |
| ASN | 48 | 2.04 | 2.04 |
| SER | 49 | 1.60 | 1.58 |
| HIS | 50 | 1.16 | 1.21 |
| GLU | 51 | 1.61 | 1.77 |
| GLY | 52 | 1.36 | 1.37 |
| LYS | 53 | 1.77 | 1.63 |
| THR | 54 | 1.14 | 1.10 |
| PHE | 55 | 0.79 | 0.76 |
| TYR | 56 | 0.84 | 0.79 |
| VAL | 57 | 1.42 | 1.10 |
| LEU | 58 | 2.01 | 1.24 |
| PRO | 59 | 2.01 | 1.26 |
| ASN | 60 | 2.53 | 1.90 |
| ASP | 61 | 2.09 | 1.94 |
| ASP | 62 | 2.05 | 2.03 |
| THR | 63 | 2.43 | 2.15 |
| LEU | 64 | 2.25 | 1.83 |
| ARG | 65 | 2.22 | 1.82 |
| VAL | 66 | 1.68 | 1.49 |
| GLU | 67 | 1.46 | 1.11 |
| ALA | 68 | 1.00 | 0.91 |
| PHE | 69 | 1.45 | 1.22 |
| GLU | 70 | 1.48 | 1.35 |
| TYR | 71 | 0.91 | 0.92 |
| TYR | 72 | 0.87 | 0.84 |
| HIS | 73 | 1.46 | 1.32 |
| THR | 74 | 1.20 | 1.13 |
| THR | 75 | 1.64 | 1.68 |
| ASP | 76 | 1.26 | 1.12 |
| PRO | 77 | 1.67 | 1.39 |
| SER | 78 | 1.31 | 1.06 |
| PHE | 79 | 0.94 | 0.86 |
| LEU | 80 | 1.27 | 1.03 |
| GLY | 81 | 0.87 | 0.79 |
| ARG | 82 | 1.26 | 1.05 |
| TYR | 83 | 0.75 | 0.71 |
| MET | 84 | 0.81 | 0.79 |
| SER | 85 | 0.99 | 1.00 |
| ALA | 86 | 0.91 | 0.86 |
| LEU | 87 | 0.89 | 0.90 |
| ASN | 88 | 1.04 | 0.98 |
| HIS | 89 | 1.27 | 1.19 |
| THR | 90 | 0.87 | 0.88 |
| LYS | 91 | 1.85 | 1.77 |
| LYS | 92 | 1.76 | 1.67 |
| TRP | 93 | 0.75 | 0.75 |
| LYS | 94 | 1.69 | 1.68 |
| TYR | 95 | 0.75 | 0.73 |
| PRO | 96 | 0.85 | 0.78 |

|     |     |      |      |
|-----|-----|------|------|
| GLN | 97  | 1.65 | 1.54 |
| VAL | 98  | 1.25 | 1.32 |
| ASN | 99  | 1.32 | 1.08 |
| GLY | 100 | 1.01 | 0.91 |
| LEU | 101 | 1.01 | 0.99 |
| THR | 102 | 0.89 | 0.84 |
| SER | 103 | 0.67 | 0.63 |
| ILE | 104 | 0.84 | 0.81 |
| LYS | 105 | 1.17 | 1.15 |
| TRP | 106 | 1.19 | 1.87 |
| ALA | 107 | 0.93 | 0.93 |
| ASP | 108 | 0.96 | 0.88 |
| ASN | 109 | 1.10 | 1.13 |
| ASN | 110 | 0.69 | 0.64 |
| CYS | 111 | 0.96 | 0.59 |
| TYR | 112 | 0.79 | 0.66 |
| LEU | 113 | 1.38 | 1.34 |
| ALA | 114 | 0.81 | 0.73 |
| THR | 115 | 0.72 | 0.64 |
| ALA | 116 | 0.81 | 0.73 |
| LEU | 117 | 0.90 | 0.80 |
| LEU | 118 | 0.81 | 0.73 |
| THR | 119 | 0.81 | 0.72 |
| LEU | 120 | 1.42 | 0.93 |
| GLN | 121 | 0.74 | 0.66 |
| GLN | 122 | 0.75 | 0.70 |
| ILE | 123 | 1.07 | 1.54 |
| GLU | 124 | 2.03 | 2.15 |
| LEU | 125 | 1.69 | 1.70 |
| LYS | 126 | 2.05 | 2.16 |
| PHE | 127 | 0.89 | 0.99 |
| ASN | 128 | 1.38 | 1.43 |
| PRO | 129 | 0.95 | 0.94 |
| PRO | 130 | 0.97 | 0.89 |
| ALA | 131 | 0.95 | 0.92 |
| LEU | 132 | 1.16 | 0.95 |
| GLN | 133 | 1.62 | 1.54 |
| ASP | 134 | 1.26 | 1.19 |
| ALA | 135 | 1.06 | 0.99 |
| TYR | 136 | 1.09 | 1.09 |
| TYR | 137 | 2.17 | 2.39 |
| ARG | 138 | 2.45 | 1.84 |
| ALA | 139 | 0.98 | 1.01 |
| ARG | 140 | 2.28 | 2.23 |
| ALA | 141 | 1.47 | 1.48 |
| GLY | 142 | 1.41 | 1.16 |
| GLU | 143 | 1.91 | 1.45 |
| ALA | 144 | 1.07 | 0.93 |
| ALA | 145 | 0.94 | 0.93 |
| ASN | 146 | 1.15 | 0.88 |
| PHE | 147 | 1.07 | 0.78 |
| CYS | 148 | 0.81 | 0.73 |
| ALA | 149 | 0.89 | 0.84 |
| LEU | 150 | 0.94 | 1.16 |
| ILE | 151 | 1.59 | 0.94 |
| LEU | 152 | 1.03 | 0.92 |
| ALA | 153 | 1.00 | 0.91 |
| TYR | 154 | 0.91 | 0.78 |
| CYS | 155 | 1.01 | 0.99 |

|     |     |      |      |
|-----|-----|------|------|
| ASN | 156 | 1.47 | 1.28 |
| LYS | 157 | 1.57 | 1.23 |
| THR | 158 | 1.53 | 1.48 |
| VAL | 159 | 1.47 | 1.53 |
| GLY | 160 | 1.01 | 0.95 |
| GLU | 161 | 1.57 | 1.56 |
| LEU | 162 | 1.85 | 1.91 |
| GLY | 163 | 0.91 | 0.83 |
| ASP | 164 | 0.93 | 1.14 |
| VAL | 165 | 1.23 | 0.87 |
| ARG | 166 | 1.26 | 1.34 |
| GLU | 167 | 1.05 | 1.38 |
| THR | 168 | 0.82 | 0.91 |
| MET | 169 | 1.02 | 1.08 |
| SER | 170 | 0.98 | 1.04 |
| TYR | 171 | 1.32 | 1.52 |
| LEU | 172 | 1.11 | 1.35 |
| PHE | 173 | 0.95 | 0.99 |
| GLN | 174 | 1.65 | 1.70 |
| HIS | 175 | 1.15 | 1.13 |
| ALA | 176 | 1.03 | 1.11 |
| ASN | 177 | 1.57 | 1.59 |
| LEU | 178 | 1.28 | 1.25 |
| ASP | 179 | 1.54 | 1.63 |
| SER | 180 | 1.37 | 1.43 |
| CYS | 181 | 0.84 | 0.83 |
| LYS | 182 | 1.78 | 1.62 |
| ARG | 183 | 0.76 | 0.72 |
| VAL | 184 | 0.98 | 0.95 |
| LEU | 185 | 1.55 | 1.35 |
| ASN | 186 | 1.36 | 1.13 |
| VAL | 187 | 1.62 | 1.61 |
| VAL | 188 | 2.06 | 1.90 |
| CYS | 189 | 2.54 | 2.33 |
| LYS | 190 | 4.55 | 4.30 |
| THR | 191 | 3.76 | 3.65 |
| CYS | 192 | 2.79 | 2.91 |
| GLY | 193 | 2.33 | 2.47 |
| GLN | 194 | 2.31 | 3.00 |
| GLN | 195 | 2.26 | 2.34 |
| GLN | 196 | 1.81 | 1.78 |
| THR | 197 | 1.54 | 1.44 |
| THR | 198 | 1.43 | 1.22 |
| LEU | 199 | 1.25 | 1.26 |
| LYS | 200 | 1.91 | 1.86 |
| GLY | 201 | 0.90 | 0.89 |
| VAL | 202 | 1.43 | 1.12 |
| GLU | 203 | 1.35 | 1.36 |
| ALA | 204 | 0.90 | 0.89 |
| VAL | 205 | 1.08 | 0.94 |
| MET | 206 | 1.04 | 0.83 |
| TYR | 207 | 0.91 | 0.74 |
| MET | 208 | 1.23 | 1.00 |
| GLY | 209 | 0.87 | 0.79 |
| THR | 210 | 1.08 | 1.03 |
| LEU | 211 | 0.85 | 0.78 |
| SER | 212 | 0.72 | 0.65 |
| TYR | 213 | 0.70 | 0.65 |
| GLU | 214 | 1.28 | 1.17 |

---

|     |     |      |      |
|-----|-----|------|------|
| GLN | 215 | 1.42 | 1.52 |
| PHE | 216 | 0.82 | 0.95 |
| LYS | 217 | 1.05 | 1.03 |
| LYS | 218 | 1.90 | 1.87 |
| GLY | 219 | 1.04 | 1.04 |
| VAL | 220 | 1.64 | 1.62 |
| GLN | 221 | 2.48 | 2.09 |
| ILE | 222 | 2.99 | 2.55 |
| PRO | 223 | 3.45 | 3.23 |
| CYS | 224 | 5.47 | 4.64 |
| LYS | 228 | 5.69 | 5.56 |
| GLN | 229 | 4.43 | 3.36 |
| ALA | 230 | 2.18 | 1.84 |
| THR | 231 | 1.59 | 1.43 |
| LYS | 232 | 1.64 | 1.51 |
| TYR | 233 | 1.03 | 1.32 |
| LEU | 234 | 1.16 | 1.16 |
| VAL | 235 | 1.34 | 1.01 |
| GLN | 236 | 1.45 | 1.22 |
| GLN | 237 | 0.67 | 0.64 |
| GLU | 238 | 1.23 | 1.27 |
| SER | 239 | 0.73 | 0.71 |
| PRO | 240 | 0.97 | 0.92 |
| PHE | 241 | 0.85 | 1.06 |
| VAL | 242 | 1.12 | 1.03 |
| MET | 243 | 0.81 | 0.72 |
| MET | 244 | 0.82 | 0.77 |
| SER | 245 | 0.70 | 0.59 |
| ALA | 246 | 0.84 | 0.83 |
| PRO | 247 | 0.95 | 0.92 |
| PRO | 248 | 0.86 | 0.87 |
| ALA | 249 | 0.97 | 0.93 |
| GLN | 250 | 1.68 | 1.39 |
| TYR | 251 | 0.92 | 0.85 |
| GLU | 252 | 1.38 | 1.29 |
| LEU | 253 | 1.08 | 0.93 |
| LYS | 254 | 1.96 | 1.90 |
| HIS | 255 | 1.35 | 1.48 |
| GLY | 256 | 1.36 | 1.05 |
| THR | 257 | 2.03 | 1.14 |
| PHE | 258 | 0.74 | 0.69 |
| THR | 259 | 0.83 | 0.80 |
| CYS | 260 | 0.73 | 0.71 |
| ALA | 261 | 0.71 | 0.64 |
| SER | 262 | 0.84 | 0.74 |
| GLU | 263 | 0.80 | 0.74 |
| TYR | 264 | 1.16 | 0.94 |
| THR | 265 | 1.57 | 1.36 |
| GLY | 266 | 1.79 | 1.50 |
| ASN | 267 | 3.35 | 3.39 |
| TYR | 268 | 6.10 | 3.82 |
| GLN | 269 | 4.58 | 4.12 |
| CYS | 270 | 3.13 | 3.15 |
| GLY | 271 | 1.36 | 1.46 |
| HIS | 272 | 0.90 | 0.79 |
| TYR | 273 | 0.87 | 0.79 |
| LYS | 274 | 1.23 | 1.19 |
| HIS | 275 | 0.63 | 0.54 |
| ILE | 276 | 0.81 | 0.83 |

---

|     |     |      |      |
|-----|-----|------|------|
| THR | 277 | 0.80 | 0.82 |
| SER | 278 | 0.86 | 1.10 |
| LYS | 279 | 1.75 | 1.85 |
| GLU | 280 | 1.84 | 1.62 |
| THR | 281 | 1.46 | 1.20 |
| LEU | 282 | 1.07 | 1.23 |
| TYR | 283 | 0.99 | 0.80 |
| CYS | 284 | 0.81 | 0.69 |
| ILE | 285 | 0.93 | 0.85 |
| ASP | 286 | 0.72 | 0.78 |
| GLY | 287 | 0.77 | 0.69 |
| ALA | 288 | 0.99 | 0.99 |
| LEU | 289 | 1.40 | 1.44 |
| LEU | 290 | 1.37 | 1.10 |
| THR | 291 | 1.23 | 0.97 |
| LYS | 292 | 1.64 | 1.48 |
| SER | 293 | 1.12 | 1.02 |
| SER | 294 | 1.33 | 1.26 |
| GLU | 295 | 1.52 | 1.44 |
| TYR | 296 | 0.79 | 0.77 |
| LYS | 297 | 1.82 | 1.78 |
| GLY | 298 | 0.76 | 0.67 |
| PRO | 299 | 0.83 | 0.70 |
| ILE | 300 | 1.00 | 0.78 |
| THR | 301 | 0.75 | 0.68 |
| ASP | 302 | 0.66 | 0.52 |
| VAL | 303 | 0.81 | 0.73 |
| PHE | 304 | 0.75 | 0.66 |
| TYR | 305 | 0.71 | 0.64 |
| LYS | 306 | 1.81 | 1.72 |
| GLU | 307 | 0.81 | 0.74 |
| ASN | 308 | 1.44 | 1.44 |
| SER | 309 | 1.01 | 0.95 |
| TYR | 310 | 0.86 | 0.90 |
| THR | 311 | 1.28 | 1.22 |
| THR | 312 | 1.22 | 1.12 |
| THR | 313 | 1.94 | 2.03 |
| ILE | 314 | 2.27 | 3.29 |
| LYS | 315 | 4.25 | 4.96 |

**Table S9:** The Root-mean square fluctuation (RMSF) values of Global and Local simulation between hesperidin and PL-Pro (Hes + PL-Pro) of SARS-CoV-2



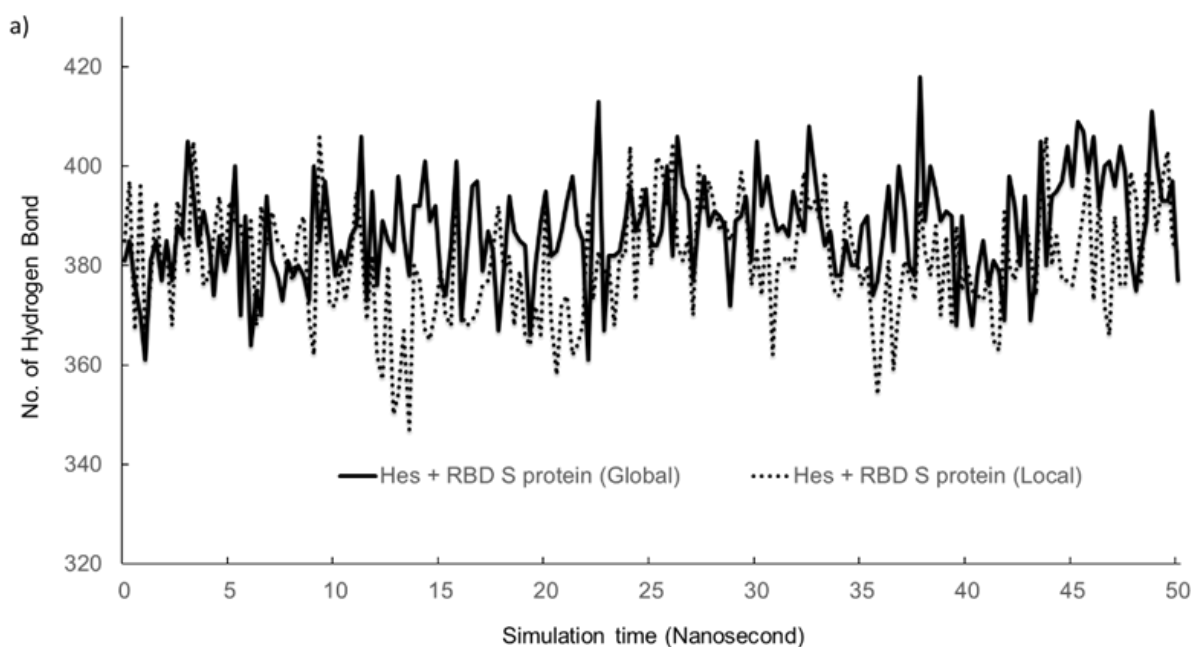

**Figure S10:** Number of Hydrogen Bond between solute and solvent of Hes + RBD S protein on Local and Global Docking

| Simulation time<br>(nanosecond, ns) | Number of Hydrogen Bond |                   |
|-------------------------------------|-------------------------|-------------------|
|                                     | Local simulation        | Global simulation |
| 0.00                                | 385                     | 381               |
| 0.25                                | 397                     | 385               |
| 0.50                                | 367                     | 376               |
| 0.75                                | 396                     | 370               |
| 1.00                                | 366                     | 361               |
| 1.25                                | 377                     | 381               |
| 1.50                                | 393                     | 385               |
| 1.75                                | 378                     | 377               |
| 2.00                                | 384                     | 385               |
| 2.25                                | 368                     | 377               |
| 2.50                                | 393                     | 388               |
| 2.75                                | 388                     | 386               |
| 3.00                                | 379                     | 405               |
| 3.25                                | 405                     | 395               |
| 3.50                                | 395                     | 384               |
| 3.75                                | 376                     | 391               |
| 4.00                                | 378                     | 385               |
| 4.25                                | 386                     | 374               |
| 4.50                                | 394                     | 386               |
| 4.75                                | 380                     | 379               |
| 5.00                                | 393                     | 384               |
| 5.25                                | 389                     | 400               |
| 5.50                                | 388                     | 370               |
| 5.75                                | 382                     | 390               |
| 6.00                                | 389                     | 364               |
| 6.25                                | 368                     | 375               |
| 6.50                                | 392                     | 370               |
| 6.75                                | 384                     | 394               |
| 7.00                                | 391                     | 381               |
| 7.25                                | 385                     | 378               |
| 7.50                                | 384                     | 373               |

---

|       |     |     |
|-------|-----|-----|
| 7.75  | 379 | 381 |
| 8.00  | 377 | 378 |
| 8.25  | 387 | 380 |
| 8.5   | 390 | 378 |
| 8.75  | 369 | 373 |
| 9.00  | 362 | 400 |
| 9.25  | 406 | 385 |
| 9.50  | 391 | 397 |
| 9.75  | 372 | 388 |
| 10.00 | 372 | 378 |
| 10.25 | 380 | 383 |
| 10.50 | 373 | 380 |
| 10.75 | 381 | 386 |
| 11.00 | 395 | 388 |
| 11.25 | 386 | 406 |
| 11.50 | 369 | 373 |
| 11.75 | 382 | 395 |
| 12.00 | 362 | 376 |
| 12.25 | 357 | 389 |
| 12.50 | 380 | 385 |
| 12.75 | 350 | 383 |
| 13.00 | 354 | 398 |
| 13.25 | 367 | 386 |
| 13.50 | 347 | 378 |
| 13.75 | 380 | 392 |
| 14.00 | 377 | 392 |
| 14.25 | 367 | 401 |
| 14.50 | 365 | 389 |
| 14.75 | 371 | 392 |
| 15.00 | 379 | 377 |
| 15.25 | 370 | 374 |
| 15.50 | 368 | 384 |
| 15.75 | 400 | 401 |
| 16.00 | 370 | 369 |
| 16.25 | 368 | 383 |
| 16.50 | 369 | 396 |
| 16.75 | 371 | 397 |
| 17.00 | 376 | 379 |
| 17.25 | 377 | 387 |
| 17.50 | 383 | 383 |
| 17.75 | 392 | 367 |
| 18.00 | 379 | 379 |
| 18.25 | 382 | 394 |
| 18.50 | 368 | 387 |
| 18.75 | 379 | 385 |
| 19.00 | 366 | 384 |
| 19.25 | 364 | 366 |
| 19.50 | 372 | 380 |
| 19.75 | 366 | 389 |
| 20.00 | 393 | 395 |
| 20.25 | 369 | 382 |
| 20.50 | 358 | 383 |
| 20.75 | 372 | 387 |
| 21.00 | 374 | 393 |
| 21.25 | 362 | 398 |
| 21.50 | 364 | 388 |
| 21.75 | 368 | 385 |
| 22.00 | 391 | 361 |
| 22.25 | 373 | 393 |

---

---

|       |     |     |
|-------|-----|-----|
| 22.50 | 383 | 413 |
| 22.75 | 378 | 367 |
| 23.00 | 380 | 382 |
| 23.25 | 368 | 382 |
| 23.50 | 382 | 383 |
| 23.75 | 382 | 389 |
| 24.00 | 404 | 396 |
| 24.25 | 373 | 387 |
| 24.50 | 395 | 390 |
| 24.75 | 396 | 395 |
| 25.00 | 380 | 384 |
| 25.25 | 402 | 384 |
| 25.50 | 400 | 387 |
| 25.75 | 392 | 400 |
| 26.00 | 404 | 382 |
| 26.25 | 384 | 406 |
| 26.50 | 381 | 396 |
| 26.75 | 386 | 393 |
| 27.00 | 370 | 377 |
| 27.25 | 400 | 389 |
| 27.50 | 391 | 398 |
| 27.75 | 397 | 388 |
| 28.00 | 392 | 391 |
| 28.25 | 387 | 390 |
| 28.50 | 389 | 388 |
| 28.75 | 385 | 372 |
| 29.00 | 388 | 389 |
| 29.25 | 399 | 390 |
| 29.50 | 392 | 394 |
| 29.75 | 376 | 381 |
| 30.00 | 383 | 405 |
| 30.25 | 374 | 392 |
| 30.50 | 389 | 398 |
| 30.75 | 362 | 391 |
| 31.00 | 380 | 387 |
| 31.25 | 381 | 388 |
| 31.50 | 382 | 386 |
| 31.75 | 379 | 395 |
| 32.00 | 389 | 390 |
| 32.25 | 399 | 387 |
| 32.50 | 391 | 408 |
| 32.75 | 393 | 399 |
| 33.00 | 389 | 390 |
| 33.25 | 399 | 384 |
| 33.50 | 379 | 387 |
| 33.75 | 374 | 378 |
| 34.00 | 374 | 378 |
| 34.25 | 393 | 385 |
| 34.50 | 385 | 380 |
| 34.75 | 381 | 380 |
| 35.00 | 376 | 388 |
| 35.25 | 380 | 390 |
| 35.50 | 366 | 374 |
| 35.75 | 354 | 377 |
| 36.00 | 369 | 386 |
| 36.25 | 381 | 396 |
| 36.50 | 359 | 383 |
| 36.75 | 372 | 400 |
| 37.00 | 381 | 392 |

---

|       |     |     |
|-------|-----|-----|
| 37.25 | 378 | 380 |
| 37.50 | 373 | 378 |
| 37.75 | 393 | 418 |
| 38.00 | 383 | 389 |
| 38.25 | 378 | 400 |
| 38.50 | 388 | 395 |
| 38.75 | 370 | 389 |
| 39.00 | 386 | 391 |
| 39.25 | 368 | 390 |
| 39.50 | 388 | 368 |
| 39.75 | 375 | 390 |
| 40.00 | 380 | 375 |
| 40.25 | 375 | 368 |
| 40.50 | 374 | 379 |
| 40.75 | 373 | 385 |
| 41.00 | 379 | 376 |
| 41.25 | 365 | 381 |
| 41.50 | 363 | 379 |
| 41.75 | 391 | 369 |
| 42.00 | 380 | 398 |
| 42.25 | 377 | 392 |
| 42.50 | 385 | 380 |
| 42.75 | 390 | 394 |
| 43.00 | 382 | 369 |
| 43.25 | 374 | 379 |
| 43.50 | 398 | 405 |
| 43.75 | 406 | 380 |
| 44.00 | 380 | 394 |
| 44.25 | 386 | 395 |
| 44.50 | 377 | 397 |
| 44.75 | 377 | 404 |
| 45.00 | 376 | 396 |
| 45.25 | 383 | 409 |
| 45.50 | 391 | 407 |
| 45.75 | 399 | 399 |
| 46.00 | 373 | 406 |
| 46.25 | 394 | 392 |
| 46.50 | 372 | 400 |
| 46.75 | 366 | 401 |
| 47.00 | 390 | 396 |
| 47.25 | 376 | 404 |
| 47.50 | 376 | 399 |
| 47.75 | 399 | 382 |
| 48.00 | 394 | 375 |
| 48.25 | 376 | 383 |
| 48.50 | 399 | 389 |
| 48.75 | 397 | 411 |
| 49.00 | 387 | 401 |
| 49.25 | 397 | 393 |
| 49.50 | 403 | 393 |
| 49.75 | 385 | 397 |
| 50.00 | 382 | 377 |

**Table S10:** Number of Hydrogen Bonds between solute and solvent per simulation time of Hes + RBD S protein

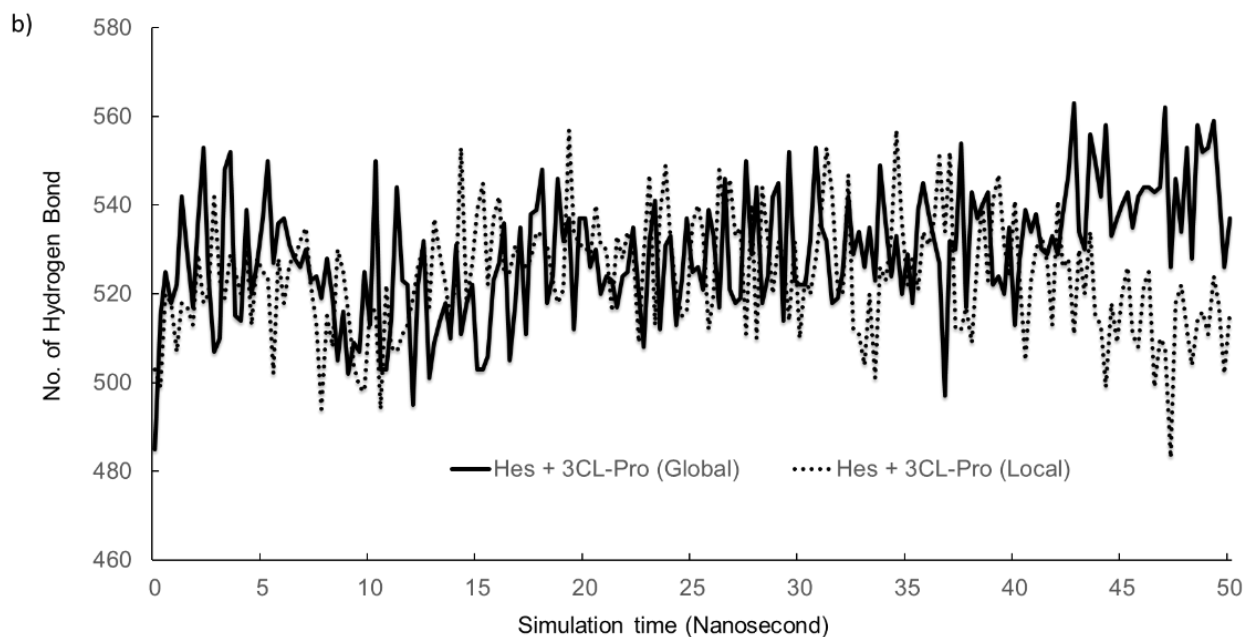

**Figure S11:** Number of Hydrogen Bond between solute and solvent of Hes + 3CL-Pro on Local and Global Docking

| Simulation time<br>(nanosecond, ns) | Number of Hydrogen Bond |                   |
|-------------------------------------|-------------------------|-------------------|
|                                     | Local simulation        | Global simulation |
| 0.00                                | 503                     | 485               |
| 0.25                                | 499                     | 515               |
| 0.50                                | 520                     | 525               |
| 0.75                                | 518                     | 518               |
| 1.00                                | 507                     | 522               |
| 1.25                                | 518                     | 542               |
| 1.50                                | 517                     | 529               |
| 1.75                                | 513                     | 517               |
| 2.00                                | 529                     | 536               |
| 2.25                                | 518                     | 553               |
| 2.50                                | 520                     | 524               |
| 2.75                                | 542                     | 507               |
| 3.00                                | 523                     | 510               |
| 3.25                                | 519                     | 548               |
| 3.50                                | 529                     | 552               |
| 3.75                                | 525                     | 515               |
| 4.00                                | 520                     | 514               |
| 4.25                                | 530                     | 539               |
| 4.50                                | 513                     | 520               |
| 4.75                                | 528                     | 527               |
| 5.00                                | 525                     | 537               |
| 5.25                                | 524                     | 550               |
| 5.50                                | 502                     | 527               |
| 5.75                                | 528                     | 536               |
| 6.00                                | 518                     | 537               |
| 6.25                                | 527                     | 531               |
| 6.50                                | 528                     | 528               |
| 6.75                                | 532                     | 526               |
| 7.00                                | 535                     | 530               |
| 7.25                                | 522                     | 523               |
| 7.50                                | 513                     | 524               |
| 7.75                                | 494                     | 519               |
| 8.00                                | 515                     | 528               |

---

|       |     |     |
|-------|-----|-----|
| 8.25  | 508 | 519 |
| 08.5  | 530 | 505 |
| 8.75  | 525 | 516 |
| 9.00  | 516 | 502 |
| 9.25  | 504 | 509 |
| 9.50  | 499 | 507 |
| 9.75  | 498 | 525 |
| 10.00 | 517 | 513 |
| 10.25 | 516 | 550 |
| 10.50 | 494 | 503 |
| 10.75 | 522 | 503 |
| 11.00 | 508 | 514 |
| 11.25 | 507 | 544 |
| 11.50 | 511 | 523 |
| 11.75 | 513 | 522 |
| 12.00 | 519 | 495 |
| 12.25 | 526 | 522 |
| 12.50 | 531 | 532 |
| 12.75 | 517 | 501 |
| 13.00 | 537 | 509 |
| 13.25 | 529 | 514 |
| 13.50 | 522 | 518 |
| 13.75 | 514 | 510 |
| 14.00 | 524 | 531 |
| 14.25 | 553 | 511 |
| 14.50 | 518 | 518 |
| 14.75 | 527 | 522 |
| 15.00 | 539 | 503 |
| 15.25 | 545 | 503 |
| 15.50 | 522 | 506 |
| 15.75 | 537 | 523 |
| 16.00 | 542 | 527 |
| 16.25 | 525 | 536 |
| 16.50 | 525 | 505 |
| 16.75 | 531 | 518 |
| 17.00 | 528 | 535 |
| 17.25 | 526 | 511 |
| 17.50 | 528 | 538 |
| 17.75 | 534 | 539 |
| 18.00 | 533 | 548 |
| 18.25 | 531 | 518 |
| 18.50 | 523 | 524 |
| 18.75 | 518 | 546 |
| 19.00 | 521 | 532 |
| 19.25 | 557 | 537 |
| 19.50 | 534 | 512 |
| 19.75 | 531 | 537 |
| 20.00 | 531 | 537 |
| 20.25 | 528 | 526 |
| 20.50 | 540 | 530 |
| 20.75 | 531 | 520 |
| 21.00 | 530 | 524 |
| 21.25 | 516 | 523 |
| 21.50 | 533 | 517 |
| 21.75 | 528 | 524 |
| 22.00 | 534 | 525 |
| 22.25 | 530 | 535 |
| 22.50 | 509 | 520 |
| 22.75 | 529 | 508 |

---

---

|       |     |     |
|-------|-----|-----|
| 23.00 | 547 | 532 |
| 23.25 | 513 | 541 |
| 23.50 | 538 | 512 |
| 23.75 | 549 | 531 |
| 24.00 | 532 | 533 |
| 24.25 | 521 | 513 |
| 24.50 | 515 | 523 |
| 24.75 | 516 | 537 |
| 25.00 | 536 | 525 |
| 25.25 | 540 | 526 |
| 25.50 | 534 | 521 |
| 25.75 | 512 | 539 |
| 26.00 | 520 | 533 |
| 26.25 | 548 | 517 |
| 26.50 | 537 | 546 |
| 26.75 | 546 | 521 |
| 27.00 | 533 | 518 |
| 27.25 | 535 | 519 |
| 27.50 | 511 | 550 |
| 27.75 | 540 | 529 |
| 28.00 | 510 | 544 |
| 28.25 | 544 | 518 |
| 28.50 | 532 | 524 |
| 28.75 | 520 | 542 |
| 29.00 | 532 | 545 |
| 29.25 | 528 | 514 |
| 29.50 | 514 | 552 |
| 29.75 | 532 | 523 |
| 30.00 | 510 | 522 |
| 30.25 | 524 | 522 |
| 30.50 | 520 | 532 |
| 30.75 | 528 | 553 |
| 31.00 | 539 | 535 |
| 31.25 | 553 | 532 |
| 31.50 | 543 | 518 |
| 31.75 | 521 | 519 |
| 32.00 | 520 | 525 |
| 32.25 | 547 | 542 |
| 32.50 | 512 | 529 |
| 32.75 | 511 | 534 |
| 33.00 | 504 | 526 |
| 33.25 | 520 | 535 |
| 33.50 | 501 | 523 |
| 33.75 | 526 | 549 |
| 34.00 | 523 | 536 |
| 34.25 | 533 | 524 |
| 34.50 | 557 | 533 |
| 34.75 | 536 | 520 |
| 35.00 | 522 | 529 |
| 35.25 | 528 | 518 |
| 35.50 | 521 | 539 |
| 35.75 | 534 | 545 |
| 36.00 | 531 | 538 |
| 36.25 | 537 | 532 |
| 36.50 | 551 | 527 |
| 36.75 | 534 | 497 |
| 37.00 | 552 | 532 |
| 37.25 | 512 | 530 |
| 37.50 | 512 | 554 |

---

|       |     |     |
|-------|-----|-----|
| 37.75 | 517 | 517 |
| 38.00 | 509 | 543 |
| 38.25 | 528 | 537 |
| 38.50 | 541 | 540 |
| 38.75 | 523 | 543 |
| 39.00 | 541 | 522 |
| 39.25 | 547 | 524 |
| 39.50 | 531 | 520 |
| 39.75 | 524 | 535 |
| 40.00 | 541 | 513 |
| 40.25 | 523 | 528 |
| 40.50 | 505 | 539 |
| 40.75 | 523 | 534 |
| 41.00 | 530 | 538 |
| 41.25 | 533 | 530 |
| 41.50 | 527 | 529 |
| 41.75 | 513 | 533 |
| 42.00 | 541 | 529 |
| 42.25 | 526 | 538 |
| 42.50 | 528 | 547 |
| 42.75 | 511 | 563 |
| 43.00 | 530 | 534 |
| 43.25 | 520 | 530 |
| 43.50 | 534 | 556 |
| 43.75 | 515 | 550 |
| 44.00 | 513 | 542 |
| 44.25 | 499 | 558 |
| 44.50 | 518 | 533 |
| 44.75 | 509 | 537 |
| 45.00 | 520 | 540 |
| 45.25 | 526 | 543 |
| 45.50 | 511 | 535 |
| 45.75 | 508 | 542 |
| 46.00 | 522 | 544 |
| 46.25 | 525 | 544 |
| 46.50 | 499 | 543 |
| 46.75 | 510 | 544 |
| 47.00 | 508 | 562 |
| 47.25 | 483 | 526 |
| 47.50 | 518 | 546 |
| 47.75 | 522 | 534 |
| 48.00 | 512 | 553 |
| 48.25 | 504 | 528 |
| 48.50 | 514 | 558 |
| 48.75 | 516 | 552 |
| 49.00 | 511 | 553 |
| 49.25 | 524 | 559 |
| 49.50 | 518 | 544 |
| 49.75 | 502 | 526 |
| 50.00 | 516 | 537 |

**Table S11:** Number of Hydrogen Bonds between solute and solvent per simulation time of Hes + 3CL-Pro



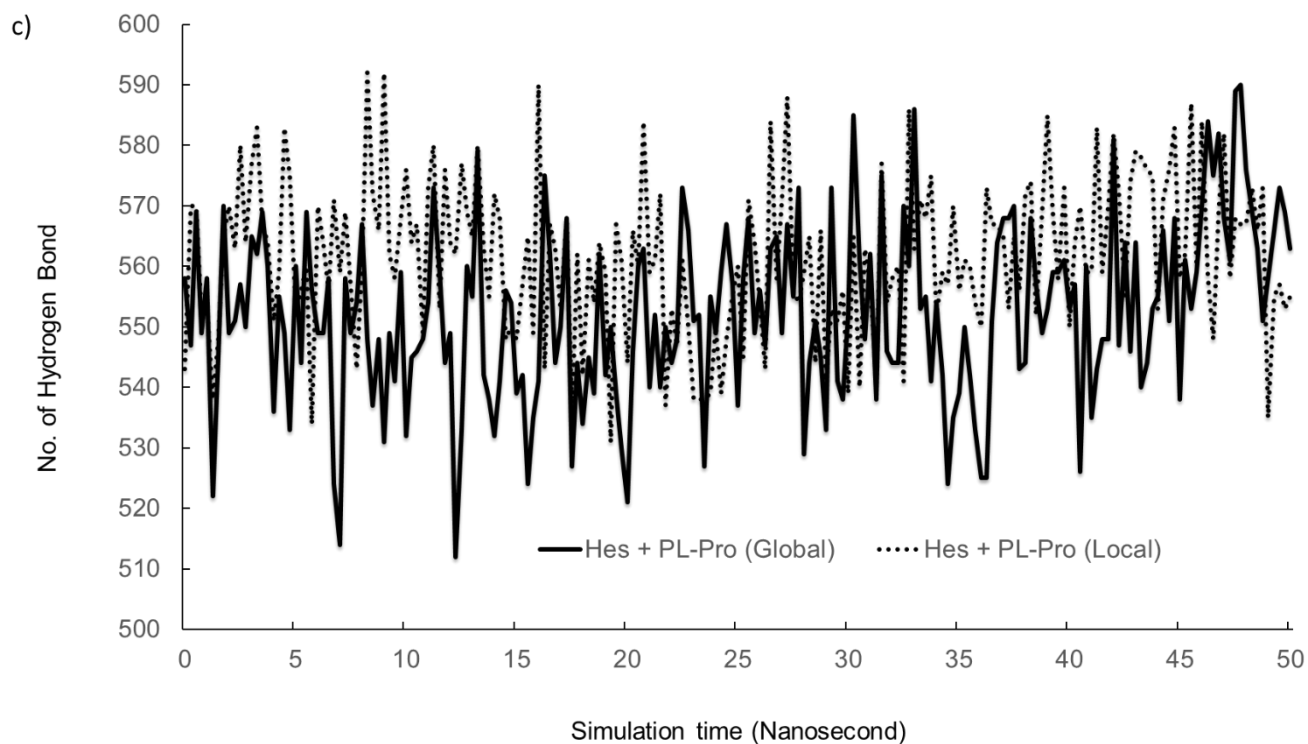

**Figure S12:** Number of Hydrogen Bond between solute and solvent of Hes + PL-Pro on Local and Global Docking

| Simulation time<br>(nanosecond, ns) | Number of Hydrogen Bond |                   |
|-------------------------------------|-------------------------|-------------------|
|                                     | Local simulation        | Global simulation |
| 0.00                                | 543                     | 558               |
| 0.25                                | 570                     | 547               |
| 0.50                                | 570                     | 569               |
| 0.75                                | 552                     | 549               |
| 1.00                                | 554                     | 558               |
| 1.25                                | 538                     | 522               |
| 1.50                                | 548                     | 545               |
| 1.75                                | 565                     | 570               |
| 2.00                                | 570                     | 549               |
| 2.25                                | 563                     | 551               |
| 2.50                                | 580                     | 557               |
| 2.75                                | 564                     | 550               |
| 3.00                                | 577                     | 565               |
| 3.25                                | 583                     | 562               |
| 3.50                                | 567                     | 569               |
| 3.75                                | 564                     | 560               |
| 4.00                                | 551                     | 536               |
| 4.25                                | 559                     | 555               |
| 4.50                                | 583                     | 549               |
| 4.75                                | 575                     | 533               |
| 5.00                                | 552                     | 560               |
| 5.25                                | 556                     | 544               |
| 5.50                                | 560                     | 569               |
| 5.75                                | 534                     | 556               |
| 6.00                                | 570                     | 549               |
| 6.25                                | 564                     | 549               |
| 6.50                                | 556                     | 558               |
| 6.75                                | 571                     | 524               |

---

|       |     |     |
|-------|-----|-----|
| 7.00  | 559 | 514 |
| 7.25  | 569 | 558 |
| 7.50  | 557 | 549 |
| 7.75  | 543 | 554 |
| 8.00  | 560 | 567 |
| 8.25  | 592 | 548 |
| 8.50  | 572 | 537 |
| 8.75  | 566 | 548 |
| 9.00  | 592 | 531 |
| 9.25  | 562 | 549 |
| 9.50  | 558 | 541 |
| 9.75  | 568 | 559 |
| 10.00 | 576 | 532 |
| 10.25 | 564 | 545 |
| 10.50 | 567 | 546 |
| 10.75 | 549 | 548 |
| 11.00 | 573 | 554 |
| 11.25 | 580 | 573 |
| 11.50 | 553 | 559 |
| 11.75 | 576 | 544 |
| 12.00 | 564 | 549 |
| 12.25 | 562 | 512 |
| 12.50 | 577 | 533 |
| 12.75 | 569 | 560 |
| 13.00 | 565 | 555 |
| 13.25 | 580 | 579 |
| 13.50 | 563 | 542 |
| 13.75 | 555 | 538 |
| 14.00 | 572 | 532 |
| 14.25 | 568 | 541 |
| 14.50 | 548 | 556 |
| 14.75 | 550 | 554 |
| 15.00 | 548 | 539 |
| 15.25 | 557 | 542 |
| 15.50 | 565 | 524 |
| 15.75 | 549 | 535 |
| 16.00 | 590 | 541 |
| 16.25 | 543 | 575 |
| 16.50 | 567 | 562 |
| 16.75 | 563 | 544 |
| 17.00 | 553 | 550 |
| 17.25 | 568 | 568 |
| 17.50 | 535 | 527 |
| 17.75 | 562 | 544 |
| 18.00 | 542 | 534 |
| 18.25 | 561 | 545 |
| 18.50 | 554 | 539 |
| 18.75 | 564 | 562 |
| 19.00 | 559 | 542 |
| 19.25 | 531 | 550 |
| 19.50 | 567 | 539 |
| 19.75 | 561 | 530 |
| 20.00 | 544 | 521 |
| 20.25 | 566 | 546 |
| 20.50 | 560 | 560 |
| 20.75 | 584 | 563 |
| 21.00 | 559 | 540 |
| 21.25 | 561 | 552 |
| 21.50 | 572 | 540 |

---

---

|       |     |     |
|-------|-----|-----|
| 21.75 | 537 | 550 |
| 22.00 | 553 | 544 |
| 22.25 | 547 | 548 |
| 22.50 | 561 | 573 |
| 22.75 | 550 | 566 |
| 23.00 | 538 | 551 |
| 23.25 | 538 | 552 |
| 23.50 | 538 | 527 |
| 23.75 | 539 | 555 |
| 24.00 | 550 | 549 |
| 24.25 | 539 | 559 |
| 24.50 | 548 | 567 |
| 24.75 | 555 | 557 |
| 25.00 | 560 | 537 |
| 25.25 | 545 | 558 |
| 25.50 | 571 | 568 |
| 25.75 | 564 | 549 |
| 26.00 | 554 | 556 |
| 26.25 | 543 | 547 |
| 26.50 | 584 | 563 |
| 26.75 | 558 | 565 |
| 27.00 | 571 | 549 |
| 27.25 | 588 | 567 |
| 27.50 | 556 | 555 |
| 27.75 | 554 | 573 |
| 28.00 | 559 | 529 |
| 28.25 | 565 | 544 |
| 28.50 | 544 | 551 |
| 28.75 | 566 | 545 |
| 29.00 | 541 | 533 |
| 29.25 | 553 | 573 |
| 29.50 | 551 | 541 |
| 29.75 | 556 | 538 |
| 30.00 | 539 | 552 |
| 30.25 | 565 | 585 |
| 30.50 | 540 | 561 |
| 30.75 | 563 | 548 |
| 31.00 | 557 | 562 |
| 31.25 | 541 | 538 |
| 31.50 | 577 | 575 |
| 31.75 | 554 | 546 |
| 32.00 | 558 | 544 |
| 32.25 | 560 | 544 |
| 32.50 | 541 | 570 |
| 32.75 | 586 | 560 |
| 33.00 | 563 | 586 |
| 33.25 | 571 | 553 |
| 33.50 | 568 | 555 |
| 33.75 | 575 | 541 |
| 34.00 | 552 | 554 |
| 34.25 | 559 | 542 |
| 34.50 | 557 | 524 |
| 34.75 | 570 | 535 |
| 35.00 | 556 | 539 |
| 35.25 | 561 | 550 |
| 35.50 | 560 | 542 |
| 35.75 | 554 | 533 |
| 36.00 | 550 | 525 |
| 36.25 | 573 | 525 |

---

|       |     |     |
|-------|-----|-----|
| 36.50 | 567 | 551 |
| 36.75 | 567 | 564 |
| 37.00 | 565 | 568 |
| 37.25 | 553 | 568 |
| 37.50 | 565 | 570 |
| 37.75 | 556 | 543 |
| 38.00 | 572 | 544 |
| 38.25 | 574 | 568 |
| 38.50 | 552 | 557 |
| 38.75 | 569 | 549 |
| 39.00 | 585 | 553 |
| 39.25 | 569 | 559 |
| 39.50 | 558 | 559 |
| 39.75 | 573 | 561 |
| 40.00 | 550 | 553 |
| 40.25 | 564 | 557 |
| 40.50 | 570 | 526 |
| 40.75 | 559 | 560 |
| 41.00 | 559 | 535 |
| 41.25 | 583 | 543 |
| 41.50 | 559 | 548 |
| 41.75 | 570 | 548 |
| 42.00 | 582 | 581 |
| 42.25 | 572 | 547 |
| 42.50 | 555 | 564 |
| 42.75 | 574 | 546 |
| 43.00 | 579 | 564 |
| 43.25 | 578 | 540 |
| 43.50 | 576 | 544 |
| 43.75 | 575 | 553 |
| 44.00 | 553 | 555 |
| 44.25 | 571 | 566 |
| 44.50 | 576 | 551 |
| 44.75 | 583 | 568 |
| 45.00 | 558 | 538 |
| 45.25 | 562 | 561 |
| 45.50 | 587 | 553 |
| 45.75 | 560 | 559 |
| 46.00 | 584 | 570 |
| 46.25 | 558 | 584 |
| 46.50 | 548 | 575 |
| 46.75 | 569 | 582 |
| 47.00 | 582 | 568 |
| 47.25 | 558 | 561 |
| 47.50 | 568 | 589 |
| 47.75 | 567 | 590 |
| 48.00 | 567 | 576 |
| 48.25 | 573 | 569 |
| 48.50 | 566 | 563 |
| 48.75 | 573 | 551 |
| 49.00 | 535 | 558 |
| 49.25 | 555 | 566 |
| 49.50 | 557 | 573 |
| 49.75 | 553 | 569 |
| 50.00 | 555 | 563 |

**Table S12:** Number of Hydrogen Bonds between solute and solvent per simulation time of Hes + PL-Pro
